# Supplementary material for: Chromatin, transcriptional and immune dysregulation in children with neurodevelopmental regression
Source: medRxiv preprint, doi:10.1101/2025.03.05.25322433, version 1 (2025-03-06)
Supplement: Supplemental Table 3 [file 322433_file09.xlsx]

## Sheet: Patient_vs_Control
ONTOLOGY
