# Supplementary material for: Chromatin, transcriptional and immune dysregulation in children with neurodevelopmental regression
Source: medRxiv preprint, doi:10.1101/2025.03.05.25322433, version 1 (2025-03-06)
Supplement: Supplemental Table 4 [file 322433_file10.xlsx]

## Sheet: Neutrophils
ONTOLOGY	ID	Description	setSize	enrichmentScore	NES	pvalue	p.adjust	qvalue	rank	leading_edge	core_enrichment	Expression	CellType
MF	GO:0003735	structural constituent of ribosome	73	-0.839866	-2.65591	1.64283e-16	1.26868e-13	1.13269e-13	314	tags=89%, list=15%, signal=78%	RPL18/RPS7/RPL10/RPL6/RPS3A/RPL15/RPS17/RPL14/RPL7A/RPS19/RPS10/RPL31/RPS2/RPL28/RPL37A/RPL19/RPL35/RPL36A/RPL26/RPS27/RPS29/RPL24/RPS4X/RPS20/RPS3/RPS18/RPS14/RPL7/RPL32/RPS23/RPS24/RPS13/RPLP2/RPL35A/RPL5/RPL17/RPL27A/RPS28/RPL38/RPS21/RPS8/RPS27A/RPLP0/RPL13/RPL23A/RPL10A/RPL36/RPS6/RPS16/RPL11/RPL23/RPL12/RPL3/RPL30/RPS25/RPL4/RPL8/RPL21/FAU/RPL34/RPS12/RPLP1/RPL13A/ISG15/RPL9	Down-regulated	Neutrophils
CC	GO:0005840	ribosome	81	-0.820739	-2.51863	1.96949e-17	6.08375e-14	5.43164e-14	314	tags=81%, list=15%, signal=72%	RPL18/RPS7/RPL10/RPL6/RPS3A/RPL15/RPS17/RPL14/RPL7A/RPS19/RPS10/RPL31/RPS2/RPL28/RPL37A/RPL19/RPL35/RPL36A/RPL26/RPS27/RPS29/RPL24/RPS4X/RPS20/RPS3/RPS18/RPS14/RPL7/RPL32/RPS23/RPS24/RPS13/RPLP2/RPL35A/RPL5/RPL17/RPL27A/RPS28/RPL38/RPS21/SF1/RPS8/RPS27A/RPLP0/RPL13/RPL23A/RPL10A/RPL36/RPS6/RPS16/RPL11/RPL23/RPL12/RPL3/RPL30/RPS25/RPL4/RPL8/RPL21/FAU/RPL34/RPS12/RPLP1/RPL13A/ISG15/RPL9	Down-regulated	Neutrophils
BP	GO:0002181	cytoplasmic translation	89	-0.731953	-2.23418	2.45089e-11	1.51416e-08	1.35186e-08	288	tags=73%, list=14%, signal=66%	RPS3A/RPL15/RPS17/RPL14/RPL7A/RPS19/RPS10/RPL31/RPS2/CPEB2/RPL28/RPL37A/RPL19/RPL35/RPL36A/RPL26/RPS27/RPS29/RPL24/RPS4X/RPS20/RPS3/RPS18/RPS14/RPL7/RPL32/RPS23/RPS24/RPS13/RPLP2/RPL35A/RPL5/RPL17/RPL27A/RPS28/RPL38/RPS21/RPS8/RPS27A/RPLP0/RPL13/RPL23A/RPL10A/RPL36/RPS6/RPS16/RPL11/RPL23/RPL12/RPL3/RPL30/RPS25/RPL4/RPL8/RPL21/FAU/RPL34/RPS12/EIF4A1/RPLP1/RPL13A/ETF1/EIF5/PABPC1/RPL9	Down-regulated	Neutrophils
MF	GO:0019843	rRNA binding	20	-0.859155	-2.16413	4.50292e-05	0.00331179	0.00295681	204	tags=80%, list=10%, signal=73%	MDM2/RPS4X/RPS3/RPS18/RPS14/RPS13/RPL5/RPLP0/RPL23A/RPL11/RPL23/RPL12/RPL3/RPL8/RPL9/DDX21	Down-regulated	Neutrophils
BP	GO:0042254	ribosome biogenesis	41	-0.757	-2.04201	1.0017e-05	0.00106699	0.00095262	314	tags=76%, list=15%, signal=65%	RPS7/RPL10/RPL6/RPS17/RPL14/RPL7A/RPS19/RPL35/RIOK3/RPL26/RPS27/RPL24/RPS14/RPL7/RPS24/RPL35A/RPL5/RPS28/RPL38/RPS21/RPS8/RPLP0/RPL23A/RPL10A/RPS6/RPS16/RPL11/RPS25/ISG20/GLUL/DDX21	Down-regulated	Neutrophils
BP	GO:0000289	nuclear-transcribed mRNA poly(A) tail shortening	10	-0.898613	-2.00283	0.00186927	0.0477204	0.0426054	20	tags=30%, list=1%, signal=30%	TOB1/PABPC1/BTG2	Down-regulated	Neutrophils
BP	GO:0006364	rRNA processing	30	-0.770272	-1.96806	0.000109686	0.00677638	0.00605003	275	tags=77%, list=13%, signal=67%	RPS17/RPL14/RPL7A/RPS19/RPL35/RIOK3/RPL26/RPS27/RPS14/RPL7/RPS24/RPL35A/RPL5/RPS28/RPS21/RPS8/RPL10A/RPS6/RPS16/RPL11/RPS25/ISG20/DDX21	Down-regulated	Neutrophils
CC	GO:0005615	extracellular space	480	0.551044	1.31419	1.74533e-05	0.00158568	0.00141571	326	tags=25%, list=16%, signal=27%	S100A8/S100A9/S100A12/CD44/CD177/GCA/CR1/PYGL/ANXA3/NIBAN1/ACTB/MGAM/VIM/BASP1/FCGR3B/CST7/FCN1/SH3BGRL/ANXA1/PADI2/GAPDH/CTSC/RTN3/S100A6/MYL12A/ARG1/ALPL/ITGB2/SERPINA1/RALB/TNFSF14/F5/STEAP4/CKAP4/FKBP5/IL1B/IL4R/SORL1/TSPO/PLSCR1/PTPRC/PGD/ITGAM/CAB39/DNAJC3/TNFSF10/ALOX5/SERPINB1/IQGAP2/HSPA1A/DYSF/RNASET2/LYZ/ACTG1/IQGAP1/DSC2/RAB27A/ADM/SNX3/FGR/VASP/CD48/ARPC5/PLBD1/S100A11/SLC2A3/CD59/FL…	Up-regulated	Neutrophils
BP	GO:0044419	biological process involved in interspecies interaction between organisms	337	0.555803	1.31953	0.000618225	0.0230084	0.0205422	320	tags=28%, list=16%, signal=28%	S100A8/S100A9/S100A12/CD177/FCER1G/CR1/PYGL/ANXA3/IRAK3/MAPK14/IFITM1/VIM/CARD16/FCN1/IL6R/CASP4/ANXA1/GAPDH/ARG1/ALPL/IL17RA/TLR5/IFNAR1/PLAC8/NLRC4/FKBP5/PTAFR/NCF2/SIGLEC10/IL1B/IL4R/TLR8/TSPO/PLSCR1/PTPRC/LILRA5/ITGAM/DNAJC3/HSPA1A/RNASET2/EMILIN2/FPR2/AIF1/LYZ/ACTG1/SELPLG/ITGAX/RAB27A/ADM/SNX3/FGR/IFNGR2/JAK2/SRPK1/MNDA/STAT5B/TRIM25/TLR6/HCK/CASP1/ACTR2/TLR1/FCGR3A/FFAR2/LITAF/JAK3/IFI16/P…	Up-regulated	Neutrophils
BP	GO:0016477	cell migration	257	0.572031	1.3561	0.00045797	0.0183723	0.016403	271	tags=25%, list=13%, signal=25%	S100A8/S100A9/S100A12/PLXNC1/CD44/CD177/FCER1G/ANXA3/IFITM1/JAML/MACF1/IL6R/RIPOR2/ANXA1/PADI2/ITGB2/IL17RA/TNFSF14/PTAFR/IL1B/SORL1/TSPO/PTPRC/ALOX5/PSTPIP2/BIN2/EMILIN2/FPR2/AIF1/ACTG1/SELPLG/IQGAP1/ITGAX/FGR/ARPC5/S100A11/CXCR2/JAK2/STAT5B/CAP1/NCKAP1L/MEGF9/BST1/MMP9/HCK/LRRK2/FFAR2/LCP1/MCTP1/CCR1/IRAK4/RHOB/ATP2B4/NLRP12/PRKCD/CXCR1/SYK/MAP4K4/TLR4/PTPRJ/CKLF/PFN1/SLK/SPI1/LGALS8	Up-regulated	Neutrophils
BP	GO:0009605	response to external stimulus	467	0.575811	1.37228	6.4283e-07	0.000116806	0.000104286	279	tags=26%, list=14%, signal=29%	S100A8/S100A9/S100A12/PLXNC1/CD177/FCER1G/CR1/BCL6/PYGL/ANXA3/IRAK3/MAPK14/IFITM1/JAML/VIM/PROK2/CST7/CARD16/FCN1/ACSL1/IL6R/RIPOR2/CASP4/ANXA1/PADI2/GAPDH/CTSC/ARG1/ALPL/ITGB2/IL17RA/TLR5/IFNAR1/RALB/TNFSF14/F5/PLAC8/NLRC4/FKBP5/PTAFR/NCF2/SIGLEC10/UPP1/IL1B/IL4R/KCNJ2/EMB/SORL1/TLR8/TSPO/PLSCR1/PTPRC/LILRA5/ITGAM/KREMEN1/DNAJC3/ALOX5/BIN2/RNASET2/EMILIN2/FPR2/AIF1/LYZ/ACTG1/ITGAX/DSC2/RAB27A/AD…	Up-regulated	Neutrophils
BP	GO:0043085	positive regulation of catalytic activity	215	0.596089	1.40332	0.000162924	0.00944556	0.0084331	252	tags=21%, list=12%, signal=21%	S100A8/S100A9/S100A12/CR1/MAPK14/CFLAR/ACSL1/IL6R/ITGB2/RALB/NLRC4/PTAFR/IL1B/SORL1/PLSCR1/PTPRC/LILRA5/ITGAM/CAB39/TNFSF10/HSPA1A/IQGAP1/FGR/JAK2/PSAP/CAP1/NCKAP1L/PPP1R12A/TLR6/CASP1/YWHAB/LRRK2/SOS2/NBN/ARL6IP5/IFI16/PPP2R3C/ATP2B4/NLRP12/PRKCD/SYK/CYBA/MAP4K4/TLR4/CAMKK2	Up-regulated	Neutrophils
BP	GO:0006952	defense response	345	0.593812	1.41034	3.07829e-06	0.00043222	0.000385891	276	tags=27%, list=14%, signal=28%	S100A8/S100A9/S100A12/CD44/CD177/FCER1G/CR1/BCL6/ANXA3/IRAK3/MAPK14/IFITM1/IL18RAP/VIM/PROK2/CST7/FCN1/IL6R/CASP4/ANXA1/GAPDH/CTSC/ARG1/ITGB2/SERPINA1/IL17RA/TLR5/IFNAR1/PLAC8/LILRB3/NLRC4/PTAFR/NCF2/SIGLEC10/IL1B/IL4R/TLR8/PLSCR1/PTPRC/LILRA5/ITGAM/DNAJC3/ALOX5/RNASET2/EMILIN2/FPR2/AIF1/LYZ/ACTG1/ITGAX/RAB27A/ADM/FGR/CD48/IFNGR2/FPR1/CXCR2/JAK2/SRPK1/MNDA/STAT5B/TRIM25/TLR6/BST1/MMP9/HCK/CASP1/A…	Up-regulated	Neutrophils
BP	GO:0006955	immune response	367	0.601763	1.43051	1.35947e-07	3.49951e-05	3.12441e-05	253	tags=27%, list=12%, signal=29%	S100A8/S100A9/S100A12/CD177/FCER1G/CR1/BCL6/ANXA3/IRAK3/MAPK14/IFITM1/IL18RAP/VIM/FCGR3B/CST7/FCN1/IL6R/CASP4/ANXA1/GAPDH/CTSC/FCGR2A/HRH2/ARG1/ITGB2/IL17RA/TLR5/IFNAR1/APBB1IP/TNFSF14/LILRB3/NLRC4/PTAFR/NCF2/SIGLEC10/IL1B/IL4R/LST1/IGSF6/LILRA6/TLR8/PLSCR1/PTPRC/LILRA5/PAG1/ITGAM/TNFSF10/ALOX5/HSPA1A/DYSF/RNASET2/FPR2/AIF1/LYZ/ACTG1/RAB27A/FGR/CD48/IFNGR2/FPR1/CD59/CXCR2/JAK2/SRPK1/MNDA/STAT5B/T…	Up-regulated	Neutrophils
CC	GO:0031224	intrinsic component of membrane	441	0.622146	1.48238	1.51851e-10	6.70098e-08	5.98271e-08	419	tags=35%, list=21%, signal=36%	PLXNC1/SYNE1/CD44/CD177/FCER1G/CR1/IFITM1/MGAM/JAML/IL18RAP/FCGR3B/KCNJ15/ACSL1/IL6R/FCGR2A/RTN3/HRH2/ALPL/ITGB2/MCEMP1/IL17RA/TLR5/IFNAR1/TNFSF14/LILRB3/VNN2/STEAP4/SLC40A1/CKAP4/PTAFR/NCF2/APMAP/SIGLEC10/IL4R/LST1/KCNJ2/IGSF6/LILRA6/EMB/P2RY13/SORL1/TLR8/TSPO/PLSCR1/PTPRC/LILRA5/C4orf3/PAG1/ITGAM/KREMEN1/ATP11B/TNFSF10/DYSF/TNFRSF10C/FPR2/CMTM6/SELPLG/ITGAX/DSC2/SLC25A37/NCF4/CD48/MS4A6A/IFNGR2…	Up-regulated	Neutrophils
BP	GO:0098609	cell-cell adhesion	142	0.647996	1.50503	4.98068e-05	0.00357798	0.00319447	344	tags=35%, list=17%, signal=31%	S100A8/S100A9/CD44/CD177/CR1/BCL6/MAPK14/ACTB/JAML/RIPOR2/ANXA1/MYL12A/ARG1/ITGB2/TNFSF14/PTAFR/IL1B/IL4R/EMB/PTPRC/PAG1/ITGAM/ALOX5/EMILIN2/AIF1/ACTG1/SELPLG/ITGAX/DSC2/S100A11/FLOT2/JAK2/STAT5B/NCKAP1L/JAK3/TLN1/ICAM3/PRKCD/SYK/SPI1/SELL/PRKAR1A/CD55/SIRPA/TNIP1/GNAS/MSN/RC3H1/RAB10/IL2RG	Up-regulated	Neutrophils
BP	GO:0006909	phagocytosis	83	0.667038	1.51232	0.000373469	0.0163072	0.0145592	251	tags=33%, list=12%, signal=30%	FCER1G/ANXA3/FCN1/ANXA1/ITGB2/NCF2/IL1B/PLSCR1/PTPRC/ITGAM/BIN2/DYSF/FPR2/AIF1/RAB27A/NCF4/SNX3/FGR/NCKAP1L/HCK/RAB31/ICAM3/PRKCD/SYK/CYBA/TLR4/PTPRJ	Up-regulated	Neutrophils
BP	GO:0001818	negative regulation of cytokine production	59	0.696659	1.5416	0.000966825	0.0324622	0.0289826	262	tags=29%, list=13%, signal=26%	CR1/BCL6/IRAK3/CARD16/ANXA1/ARG1/TLR8/TSPO/PTPRC/LILRA5/SERPINB1/NCKAP1L/TLR6/JAK3/NLRP12/TLR4/NFKB1	Up-regulated	Neutrophils
MF	GO:0033293	monocarboxylic acid binding	11	0.869681	1.5596	0.0020283	0.0492846	0.0440019	12	tags=27%, list=1%, signal=27%	S100A8/S100A9/PYGL	Up-regulated	Neutrophils
BP	GO:0072593	reactive oxygen species metabolic process	51	0.71682	1.56139	0.000385375	0.0163072	0.0145592	253	tags=39%, list=12%, signal=35%	CD177/MAPK14/CFLAR/ITGB2/NCF2/TSPO/ITGAM/ALOX5/FPR2/RAB27A/NCF4/TLR6/BST1/LRRK2/PRKCD/ACOX1/SYK/CYBA/TLR4/CYBB	Up-regulated	Neutrophils
BP	GO:0050772	positive regulation of axonogenesis	12	0.867875	1.58622	0.0017128	0.0452209	0.0403737	35	tags=17%, list=2%, signal=16%	PLXNC1/MACF1	Up-regulated	Neutrophils
CC	GO:0099503	secretory vesicle	268	0.669142	1.58767	6.48291e-11	3.33762e-08	2.97987e-08	327	tags=35%, list=16%, signal=34%	S100A8/S100A9/S100A12/CD44/CD177/FCER1G/GCA/CR1/PYGL/ANXA3/MAPK14/MGAM/FCGR3B/FCN1/PADI2/CTSC/FCGR2A/GYG1/ARG1/ITGB2/MCEMP1/SERPINA1/F5/PLAC8/LILRB3/SLC40A1/CKAP4/PTAFR/NCF2/IL1B/HK3/PTPRC/ITGAM/CAB39/DNAJC3/ATP11B/ALOX5/SERPINB1/IQGAP2/HSPA1A/BIN2/RNASET2/FPR2/LYZ/CMTM6/IQGAP1/ITGAX/RAB27A/FGR/ARPC5/S100A11/FPR1/SLC2A3/CD59/CXCR2/FLOT2/MNDA/PSAP/SIGLEC5/SLCO4C1/CAP1/NCKAP1L/ARHGAP9/BST1/MMP9/ACT…	Up-regulated	Neutrophils
BP	GO:0006919	activation of cysteine-type endopeptidase activity involved in apoptotic process	17	0.821075	1.59106	0.000945652	0.0324569	0.0289779	151	tags=29%, list=7%, signal=27%	S100A8/S100A9/CFLAR/NLRC4/JAK2	Up-regulated	Neutrophils
BP	GO:0048708	astrocyte differentiation	15	0.844201	1.59557	0.00156473	0.0420301	0.0375249	80	tags=27%, list=4%, signal=26%	S100A8/S100A9/VIM/IL1B	Up-regulated	Neutrophils
BP	GO:0001774	microglial cell activation	15	0.844242	1.59565	0.00156473	0.0420301	0.0375249	178	tags=60%, list=9%, signal=55%	CST7/CTSC/ITGB2/PTPRC/ITGAM/AIF1/IFNGR2/JAK2/LRRK2	Up-regulated	Neutrophils
BP	GO:0045621	positive regulation of lymphocyte differentiation	28	0.776883	1.59708	0.000958847	0.0324622	0.0289826	238	tags=36%, list=12%, signal=32%	CR1/BCL6/ACTB/ANXA1/IL4R/PTPRC/STAT5B/NCKAP1L/PPP2R3C/SYK	Up-regulated	Neutrophils
BP	GO:0046916	cellular transition metal ion homeostasis	16	0.836902	1.59971	0.00113545	0.0361589	0.0322831	72	tags=25%, list=4%, signal=24%	S100A8/S100A9/STEAP4/SLC40A1	Up-regulated	Neutrophils
BP	GO:1903307	positive regulation of regulated secretory pathway	13	0.866969	1.60001	0.00123215	0.0384455	0.0343246	238	tags=69%, list=12%, signal=62%	CD177/ITGB2/PTAFR/IL4R/ITGAM/RAB27A/FGR/RAB3D/SYK	Up-regulated	Neutrophils
BP	GO:0045663	positive regulation of myoblast differentiation	11	0.893509	1.60233	0.000712692	0.0255989	0.022855	63	tags=36%, list=3%, signal=35%	MAPK14/ACTB/RIPOR2/TNFSF14	Up-regulated	Neutrophils
MF	GO:0005509	calcium ion binding	84	0.728932	1.65346	3.73755e-06	0.00050197	0.000448164	283	tags=38%, list=14%, signal=34%	S100A8/S100A9/S100A12/GCA/ANXA3/MACF1/ANXA1/PADI2/S100A6/MYL12A/ALPL/PLSCR1/DYSF/AIF1/IQGAP1/DSC2/S100A11/NHSL2/TKT/LPCAT2/MYL6/S100A4/LCP1/MCTP1/MCTP2/PADI4/PGS1/CBL/CAMKK2/EFHD2/RASGRP4/SELL	Up-regulated	Neutrophils
MF	GO:0004888	transmembrane signaling receptor activity	86	0.731678	1.66141	9.06672e-07	0.000147406	0.000131606	258	tags=44%, list=13%, signal=40%	PLXNC1/CD44/FCER1G/CR1/IL18RAP/FCGR3B/IL6R/FCGR2A/HRH2/ITGB2/IL17RA/TLR5/IFNAR1/LILRB3/PTAFR/IL4R/IGSF6/LILRA6/P2RY13/SORL1/TLR8/PTPRC/LILRA5/TNFRSF10C/FPR2/IFNGR2/FPR1/CXCR2/TLR6/TLR1/FCGR3A/FFAR2/CCR1/ANTXR2/CXCR1/CSF2RB/TLR4/TNFRSF1A	Up-regulated	Neutrophils
CC	GO:0030312	external encapsulating structure	33	0.809739	1.68144	9.73706e-06	0.00106699	0.00095262	197	tags=45%, list=10%, signal=42%	S100A8/S100A9/FCN1/ANXA1/CTSC/S100A6/ALPL/SERPINA1/PLSCR1/SERPINB1/EMILIN2/PSAP/MEGF9/MMP9/S100A4	Up-regulated	Neutrophils
CC	GO:0031012	extracellular matrix	33	0.809739	1.68144	9.73706e-06	0.00106699	0.00095262	197	tags=45%, list=10%, signal=42%	S100A8/S100A9/FCN1/ANXA1/CTSC/S100A6/ALPL/SERPINA1/PLSCR1/SERPINB1/EMILIN2/PSAP/MEGF9/MMP9/S100A4	Up-regulated	Neutrophils
MF	GO:0048306	calcium-dependent protein binding	17	0.884266	1.71351	2.23169e-05	0.00186316	0.00166345	49	tags=41%, list=2%, signal=41%	S100A8/S100A9/S100A12/CD177/ANXA3/ANXA1/S100A6	Up-regulated	Neutrophils
BP	GO:2001244	positive regulation of intrinsic apoptotic signaling pathway	16	0.90693	1.73357	1.46097e-05	0.00142476	0.00127205	2	tags=12%, list=0%, signal=13%	S100A8/S100A9	Up-regulated	Neutrophils
BP	GO:0051091	positive regulation of DNA-binding transcription factor activity	50	0.801425	1.74186	8.9403e-07	0.000147406	0.000131606	164	tags=32%, list=8%, signal=30%	S100A8/S100A9/S100A12/ANXA3/IRAK3/IL18RAP/CFLAR/CARD16/NLRC4/IL1B/HSPA1A/FLOT2/JAK2/TRIM25/MTPN/TLR6	Up-regulated	Neutrophils

## Sheet: Classical.Monocytes
ONTOLOGY	ID	Description	setSize	enrichmentScore	NES	pvalue	p.adjust	qvalue	rank	leading_edge	core_enrichment	Expression	CellType
CC	GO:0022626	cytosolic ribosome	88	-0.877823	-3.75413	3.91476e-41	1.6121e-37	1.40396e-37	210	tags=65%, list=6%, signal=63%	RPL6/RPS14/RPL10A/RPL7/RPS7/RPL8/RPL36/RPL28/RPL24/RPL27A/RPS18/RPL15/RPS11/RPL7A/RPL4/RPL3/RPS10/RPS16/RPL35/RPS27A/RPLP0/RPS15A/RPS20/RPLP2/RPS26/RPL32/RPL21/FAU/RPL13/RPL12/RPL37A/RPLP1/RPL23A/RPS4X/RPS21/RPL17/RPS13/RPL38/RPL31/RPS8/RPS17/RPL13A/RPS24/RPS6/RPL11/RPL34/RPL19/RPS25/RPL35A/RPL26/RPL23/RPS29/RPL37/RPL9/RPL30/RPS23/RPS12	Down-regulated	Classical.Monocytes
MF	GO:0003735	structural constituent of ribosome	96	-0.847956	-3.70635	6.63274e-38	9.10454e-35	7.92903e-35	280	tags=65%, list=8%, signal=61%	RPS15/UBA52/RPS19/MRPL33/RPL10/RPL6/RPS14/RPL10A/RPL7/RPS7/RPL8/RPL36/RPL28/RPL24/RPL27A/RPS18/RPL15/RPS11/RPL7A/RPL4/RPL3/RPS10/RPS16/RPL35/RPS27A/RPLP0/RPS15A/RPS20/RPLP2/RPS26/RPL32/RPL21/FAU/RPL13/RPL12/RPL37A/RPLP1/RPL23A/RPS4X/RPS21/RPL17/RPS13/RPL38/RPL31/RPS8/RPS17/RPL13A/RPS24/RPS6/RPL11/RPL34/RPL19/RPS25/RPL35A/RPL26/RPL23/RPS29/RPL37/RPL9/RPL30/RPS23/RPS12	Down-regulated	Classical.Monocytes
BP	GO:0002181	cytoplasmic translation	126	-0.767582	-3.54267	3.47774e-34	3.58034e-31	3.11807e-31	210	tags=47%, list=6%, signal=46%	RPL6/RPS14/RPL10A/RPL7/RPS7/RPL8/RPL36/RPL28/EIF4A1/RPL24/RPL27A/RPS18/RPL15/RPS11/RPL7A/RPL4/RPL3/RPS10/RPS16/RPL35/PABPC1/RPS27A/RPLP0/RPS15A/RPS20/RPLP2/RPS26/RPL32/RPL21/FAU/RPL13/RPL12/RPL37A/RPLP1/RPL23A/RPS4X/RPS21/RPL17/RPS13/RPL38/RPL31/RPS8/RPS17/RPL13A/RPS24/RPS6/RPL11/RPL34/RPL19/RPS25/RPL35A/RPL26/RPL23/RPS29/RPL37/RPL9/RPL30/RPS23/RPS12	Down-regulated	Classical.Monocytes
MF	GO:0019843	rRNA binding	31	-0.76448	-2.52157	1.88478e-08	6.46795e-06	5.63286e-06	208	tags=48%, list=6%, signal=46%	RPS14/SBDS/RPL8/RPS18/RPS11/RPL3/RPLP0/RPL12/RPL23A/RPS4X/RPS13/RPL11/RPL23/RPL37/RPL9	Down-regulated	Classical.Monocytes
CC	GO:0042613	MHC class II protein complex	11	-0.896171	-2.35119	7.78207e-06	0.00139333	0.00121343	139	tags=45%, list=4%, signal=44%	HLA-DPA1/HLA-DRA/HLA-DQB1/CD74/B2M	Down-regulated	Classical.Monocytes
BP	GO:0002399	MHC class II protein complex assembly	10	-0.88296	-2.28826	3.77106e-05	0.00485288	0.00422632	139	tags=40%, list=4%, signal=39%	HLA-DPA1/HLA-DRA/HLA-DQB1/B2M	Down-regulated	Classical.Monocytes
BP	GO:0002503	peptide antigen assembly with MHC class II protein complex	10	-0.88296	-2.28826	3.77106e-05	0.00485288	0.00422632	139	tags=40%, list=4%, signal=39%	HLA-DPA1/HLA-DRA/HLA-DQB1/B2M	Down-regulated	Classical.Monocytes
BP	GO:0042273	ribosomal large subunit biogenesis	30	-0.693255	-2.24302	5.81967e-06	0.00108934	0.000948689	250	tags=47%, list=7%, signal=44%	GTPBP4/RPL10/RPL6/RPL10A/RPL7/RPL24/RPL7A/RPL35/RPLP0/RPL23A/RPL38/RPL11/RPL35A/RPL26	Down-regulated	Classical.Monocytes
MF	GO:0055106	ubiquitin-protein transferase regulator activity	11	-0.852188	-2.2358	0.000111963	0.0107705	0.00937989	160	tags=73%, list=4%, signal=70%	RPS15/RPS7/UBE2L3/RPS20/RPL11/TRIB1/RPL23/RPL37	Down-regulated	Classical.Monocytes
BP	GO:1904666	regulation of ubiquitin protein ligase activity	10	-0.84509	-2.19012	0.000278115	0.0200926	0.0174984	280	tags=60%, list=8%, signal=56%	RPS15/RPS7/RPS20/RPL11/RPL23/RPL37	Down-regulated	Classical.Monocytes
BP	GO:1901798	positive regulation of signal transduction by p53 class mediator	13	-0.790664	-2.1378	0.000234914	0.0189682	0.0165191	160	tags=54%, list=4%, signal=52%	RPS15/RPS7/RPS20/RPL11/RPL26/RPL23/RPL37	Down-regulated	Classical.Monocytes
BP	GO:0044706	multi-multicellular organism process	42	-0.575291	-2.09436	4.08895e-05	0.00510252	0.00444372	119	tags=19%, list=3%, signal=19%	ASH1L/RGS2/FOSB/IL1B/PTGS2/JUNB/H3-3B/FOS	Down-regulated	Classical.Monocytes
BP	GO:0035914	skeletal muscle cell differentiation	13	-0.769627	-2.08092	0.000498562	0.0276286	0.0240614	4	tags=31%, list=0%, signal=31%	MEF2D/FOS/BTG2/EGR1	Down-regulated	Classical.Monocytes
BP	GO:0002673	regulation of acute inflammatory response	12	-0.767995	-2.07632	0.000746237	0.0357326	0.0311191	269	tags=42%, list=7%, signal=39%	BTK/HLA-E/ASH1L/IL1B/PTGS2	Down-regulated	Classical.Monocytes
BP	GO:0006364	rRNA processing	66	-0.475045	-1.88845	0.000244589	0.0193696	0.0168687	316	tags=32%, list=9%, signal=30%	GTPBP4/DDX21/RPS15/RPS19/RPS14/RPL10A/SBDS/RPL7/RPS7/RPL7A/RPS16/RPL35/RPS21/RPS8/RPS17/RPS24/RPS6/RPL11/RPS25/RPL35A/RPL26	Down-regulated	Classical.Monocytes
MF	GO:0001216	DNA-binding transcription activator activity	85	-0.44369	-1.88332	0.000112465	0.0107705	0.00937989	253	tags=20%, list=7%, signal=19%	PBX2/MLXIP/E2F3/MTF1/ELK4/KLF6/CEBPA/CEBPD/IRF1/FOSB/KLF4/ATF4/JUN/NR4A2/JUNB/FOS/EGR1	Down-regulated	Classical.Monocytes
MF	GO:0001228	DNA-binding transcription activator activity, RNA polymerase II-specific	85	-0.44369	-1.88332	0.000112465	0.0107705	0.00937989	253	tags=20%, list=7%, signal=19%	PBX2/MLXIP/E2F3/MTF1/ELK4/KLF6/CEBPA/CEBPD/IRF1/FOSB/KLF4/ATF4/JUN/NR4A2/JUNB/FOS/EGR1	Down-regulated	Classical.Monocytes
BP	GO:0071248	cellular response to metal ion	43	-0.506186	-1.85198	0.000795139	0.036382	0.0316847	223	tags=28%, list=6%, signal=27%	APP/MTF1/CPNE3/CEBPA/SLC25A24/FOSB/ATF4/JUN/PTGS2/B2M/JUNB/FOS	Down-regulated	Classical.Monocytes
BP	GO:0009612	response to mechanical stimulus	50	-0.475992	-1.81716	0.0011772	0.0475265	0.0413902	113	tags=18%, list=3%, signal=18%	IRF1/CXCR4/FOSB/JUN/IL1B/PTGS2/NFKBIA/FOS/BTG2	Down-regulated	Classical.Monocytes
BP	GO:1901214	regulation of neuron death	89	-0.411774	-1.7597	0.000203826	0.0171297	0.0149181	85	tags=8%, list=2%, signal=8%	ATF4/MCL1/JUN/NR4A2/FOS/BTG2/EGR1	Down-regulated	Classical.Monocytes
BP	GO:0007610	behavior	97	-0.380254	-1.65994	0.000719302	0.034848	0.0303487	78	tags=8%, list=2%, signal=8%	ID2/SGK1/NR4A2/PTGS2/B2M/FOS/BTG2/EGR1	Down-regulated	Classical.Monocytes
MF	GO:0030554	adenyl nucleotide binding	392	0.390855	1.37678	0.000271682	0.0199783	0.0173989	1460	tags=48%, list=40%, signal=33%	NLRC4/MAPK14/BAZ1B/APAF1/ATP6V1B2/HADHA/MYH9/PDK4/HSPA1A/IRAK3/IPMK/ACTR3/ACADVL/DDX42/VPS4B/EIF4G1/LRRK2/WNK1/TAOK1/SWAP70/PRKCD/PNPLA8/THRAP3/FGR/NAGK/MAP3K3/ACTB/WARS1/CSNK2A1/PPIP5K2/TOP1/ACSL4/MAPK1/KIF5B/DDX17/NARS1/NT5C2/ACTR2/HCK/EPRS1/MAP3K7/PAK2/MYO5A/HSPA4/PAPOLA/PRPF4B/DICER1/XRCC5/KIAA0232/ETNK1/CCT5/ATP11A/SLFN11/SYK/XRCC6/ACSL1/DDX46/MAP3K1/GLUD1/HIPK1/NADK/OXSR1/EIF2AK1/CHST15/RAL…	Up-regulated	Classical.Monocytes
BP	GO:0016192	vesicle-mediated transport	476	0.390316	1.38262	0.000105579	0.0107705	0.00937989	1144	tags=40%, list=31%, signal=32%	PTPRC/FKBP15/RTN3/NCF2/DYSF/RAB8B/FCER1G/FCN1/MYH9/FPR2/CD93/CCR1/VPS35/SORT1/HSPA1A/DNAJC13/SLC11A1/RALB/LRP1/MSN/ASGR1/SNX27/SEC24B/RAB27A/RAP1B/STX7/VPS4B/LRRK2/UNC13D/RAB3D/RAB10/ANXA2/PSTPIP1/PRKCD/ADGRE2/SIRPB1/FGR/AP3D1/ACTB/RAB14/COPB2/ARL11/COPA/MAPK1/TMEM50A/SEC22B/CD36/ICAM3/WAS/USP7/ARFGEF1/VPS13C/HCK/LAMTOR1/CNIH4/CANX/WASHC4/CCR2/SMCR8/ASGR2/MYO5A/ARL8B/SNX18/SNX2/MICAL1/LYST/IL4R/S…	Up-regulated	Classical.Monocytes
BP	GO:0051640	organelle localization	184	0.423793	1.43744	0.00111876	0.0460707	0.0401224	818	tags=33%, list=22%, signal=27%	RAB8B/MYH9/XPO1/ACTR3/RALB/VMP1/RAB27A/STX7/VPS4B/LRRK2/UNC13D/RAB3D/RAB10/ADGRE2/FGR/RHOT1/AP3D1/KIF5B/ACTR2/LAMTOR1/MYO5A/ARL8B/NSFL1C/IL4R/STXBP2/AGTPBP1/SYK/USO1/HOOK3/PCM1/MEF2A/STX12/SNAPIN/CBL/PICALM/EZR/IRAG2/PAFAH1B1/SNAP23/CHMP5/ITGB1/ARCN1/CUL3/AP3B1/NUMA1/MAP4/CDC42/CD300A/NUDC/LMNB1/PDCD10/DYNLT1/NUP62/KPNB1/CTBP2/TSG101/HSBP1/STXBP3/DNM2/AHCYL1	Up-regulated	Classical.Monocytes
MF	GO:0016301	kinase activity	182	0.424151	1.43744	0.0012165	0.0486363	0.0423568	1362	tags=50%, list=37%, signal=33%	MAPK14/BAZ1B/PDK4/IRAK3/IPMK/LRRK2/WNK1/TAOK1/PRKCD/FGR/NAGK/MAP3K3/CSNK2A1/PPIP5K2/TOP1/MAPK1/NT5C2/HCK/MAP3K7/PAK2/PRPF4B/ETNK1/SYK/MAP3K1/HIPK1/IGF2R/NADK/OXSR1/EIF2AK1/CERT1/ILK/MAP4K4/STK38/GRK3/HIPK2/UHMK1/CSNK1A1/PKM/RASSF2/PAPSS1/CSNK1G2/GRK6/HK1/TK2/STK38L/AKAP13/IKBKB/STK10/PTK2B/BMP2K/PIKFYVE/SRPK1/TBK1/HIPK3/SGMS2/TRIM24/LYN/HK3/JAK2/SMG1/CDK13/CAMKK2/ROCK2/TGFBR2/PIK3C3/AK2/JAK1/PIK3…	Up-regulated	Classical.Monocytes
BP	GO:0051336	regulation of hydrolase activity	290	0.415289	1.44658	0.000249601	0.0193936	0.0168896	1056	tags=37%, list=29%, signal=29%	NLRC4/PLXNC1/PTPRC/S100A9/MEFV/APAF1/RIPOR2/IQGAP1/IQGAP2/CR1/SERPINA1/SORT1/HSPA1A/CTSH/CAST/IFI16/LRP1/S100A8/LRRK2/CCPG1/WNK1/TNFSF10/ANXA2/S1PR4/PRKCD/SOS2/CSNK2A1/KDM5A/CHP1/SERPINB9/DOCK11/BCL2L13/SERPINB1/ARFGEF1/PPP1R12A/SERPINB6/APLP2/NRDC/SMCR8/PAK2/STAT3/SNX18/ARL6IP5/MICAL1/TIPRL/CD86/SOS1/HDAC1/SYK/RALBP1/FNTA/FKBP1A/CORO1C/MAP4K4/CFLAR/PICALM/RAP1A/ARHGAP25/PAFAH1B1/ITGB1/PLCB2/CARD…	Up-regulated	Classical.Monocytes
BP	GO:0045087	innate immune response	281	0.421942	1.4679	0.00014484	0.0132545	0.0115432	1266	tags=44%, list=34%, signal=32%	NLRC4/CYBB/S100A9/NCF2/TLR8/MEFV/FCER1G/FCN1/FPR2/CR1/MPEG1/CX3CR1/IRAK3/SLC11A1/ACTR3/LILRA5/IFI16/S100A8/S100A12/MNDA/RAB27A/UNC13D/SLA/PSTPIP1/CLEC4E/FBXO9/FGR/SIGLEC10/MR1/SERPINB9/WAS/KIF5B/VIM/ACTR2/OTUD4/HCK/EPRS1/MAP3K7/PAK2/ARL8B/LYST/XRCC5/TMEM33/IL17RA/SYK/MSRB1/XRCC6/IPO7/TASL/TLR4/IFNAR1/AZI2/TLR6/CASP4/PTPN1/TLR1/LILRA2/PARP9/CRK/PTPN6/CDC42/IFNGR1/TRIM22/ITCH/KYNU/ERAP1/HK1/PADI4/B…	Up-regulated	Classical.Monocytes
CC	GO:0099503	secretory vesicle	393	0.434246	1.5302	2.1436e-07	5.88489e-05	5.12508e-05	1008	tags=39%, list=27%, signal=32%	PTPRC/CYBB/LILRB3/S100A9/MAPK14/NCF2/MCEMP1/RAB8B/FCER1G/F5/GYG1/APAF1/ATP6V1B2/FCN1/MYH9/FPR2/PADI2/IQGAP1/IQGAP2/CD93/MOSPD2/OSCAR/CR1/SERPINA1/HSPA1A/DNAJC13/SLC11A1/CTSH/S100A8/OSTF1/S100A12/GCA/DNAJC3/CD68/MNDA/RAB27A/RAP1B/STX7/LRRK2/UNC13D/RAB3D/RAB10/ANXA2/QPCT/PRKCD/FGL2/SIRPB1/FGR/ITPR2/FPR1/RAB14/MAPK1/CD36/FERMT3/SERPINB1/ACTR2/GNS/VPS13C/DIAPH1/HLA-H/SERPINB6/APLP2/CAB39/LAMTOR1/PAK2…	Up-regulated	Classical.Monocytes
MF	GO:0005509	calcium ion binding	111	0.475503	1.54759	0.000505594	0.0276286	0.0240614	1156	tags=50%, list=31%, signal=35%	VCAN/S100A9/DYSF/PADI2/IQGAP1/LCP1/CD93/TKT/LRP1/S100A8/S100A12/GCA/SULF2/NIN/SWAP70/ANXA2/CLEC4E/ADGRE2/RHOT1/ITPR2/CHP1/AOAH/CANX/EFCAB14/EDEM3/TPM4/CEMIP2/ANXA2P2/SLC8A1/CBL/PLCB2/EFHD2/EPS15/MCTP1/CCDC47/PADI4/C2CD5/BNIP2/ANXA1/ACER3/ITSN2/SUSD1/HSPA5/CANT1/CAMKK2/NHSL2/LPCAT2/CLEC4A/MICU1/CAPNS1/NOTCH2/PPP3CB/PRKCSH/PLSCR1/GNPTAB	Up-regulated	Classical.Monocytes
BP	GO:0002366	leukocyte activation involved in immune response	113	0.477115	1.55488	0.000299469	0.0212623	0.0185171	1003	tags=52%, list=27%, signal=39%	PTPRC/DYSF/FCER1G/LCP1/GAPT/CR1/CX3CR1/SLC11A1/IL6R/RAB27A/UNC13D/SWAP70/CLEC4E/FGL2/ADGRE2/FGR/DOCK11/KMT5B/CCR2/STAT3/LFNG/CD86/IL4R/STAT6/STXBP2/SYK/TGFB1/TLR4/APBB1IP/RIF1/CBL/SNAP23/LILRA2/PRAM1/PTPN6/CD300A/SPN/NBN/NCKAP1L/RARA/ZBTB7B/ITGAL/PTK2B/NMI/STXBP3/HSPD1/ANXA1/PHF14/LILRB1/CORO1A/LYN/DOCK2/LAT2/BCL6/PLCL2/GRN/CD244/PSEN1/LAMP1	Up-regulated	Classical.Monocytes
BP	GO:0030036	actin cytoskeleton organization	202	0.458506	1.56496	1.62519e-05	0.00267701	0.00233137	1345	tags=53%, list=36%, signal=36%	MYH9/IQGAP1/IQGAP2/LCP1/TLN1/ACTR3/LRP1/TAOK1/SWAP70/PSTPIP1/KRAS/PRKCD/ARHGAP26/FLII/ACTB/EHBP1L1/TPM3/VASP/WAS/ACTR2/ARFGEF1/CAPZB/HCK/DIAPH1/WASHC4/PAK2/MYO5A/MICAL1/GAS7/MSRB1/PPFIA1/TPM4/ARFIP1/WASHC2C/ADD1/MEF2A/CAPZA2/EPB41L3/PSTPIP2/CORO1C/SMAD4/CTNNA1/CNN2/CFLAR/TMOD3/EZR/ARHGAP25/PAFAH1B1/PTPN1/ITGB1/CUL3/FLNA/PRKAR1A/CRK/HCLS1/TMOD2/IQSEC1/CDC42/TWF2/MTPN/DBNL/BST1/NCKAP1L/PLEC/BST2/FG…	Up-regulated	Classical.Monocytes
CC	GO:0005887	integral component of plasma membrane	204	0.474496	1.62103	4.09725e-06	0.000843623	0.000734701	1015	tags=45%, list=27%, signal=35%	PLXNC1/PTPRC/CYBB/LILRB3/NCF2/FCER1G/CCR1/MOSPD2/CR1/CX3CR1/SLC11A1/IL6R/LRP1/IGSF6/ASGR1/SLC24A4/TNFRSF1A/TNFSF10/S1PR4/ADGRE2/SIRPB1/LNPEP/CD36/ICAM3/EMB/HLA-H/HRH2/CANX/CCR2/LPAR6/SELPLG/FCGR2A/IL4R/ATP11A/IL17RA/SLC16A3/CEMIP2/IGF2R/TLR4/IFNAR1/SLC8A1/SLC35A1/CALHM6/TLR6/IRAG2/AQP9/ITGB1/FLNA/TLR1/LILRA2/SLC7A7/ITGA5/IL6ST/IFNGR1/PECAM1/SLC2A3/SPN/PLXNB2/SLC12A6/LILRB4/NCKAP1L/TNFSF8/CSF2RB/T…	Up-regulated	Classical.Monocytes
MF	GO:0003779	actin binding	125	0.498755	1.64161	1.75615e-05	0.00267845	0.00233263	879	tags=41%, list=24%, signal=32%	FKBP15/MEFV/MYH9/IQGAP1/IQGAP2/LCP1/TLN1/ACTR3/SYNE1/MSN/LRRK2/PSTPIP1/FLII/TPM3/VASP/WAS/ACTR2/CAPZB/DIAPH1/PXK/MYO5A/MICAL1/GAS7/MSRB1/TPM4/ADD1/CAPZA2/EPB41L3/PSTPIP2/CORO1C/CTNNA1/CNN2/TMOD3/EZR/ITGB1/FLNA/PPP1R18/HCLS1/TMOD2/VCL/TWF2/DBNL/YWHAH/PLEC/STK38L/ARPC5/MICAL2/PHACTR2/CAPZA1/CORO1A/UTRN	Up-regulated	Classical.Monocytes
BP	GO:0097696	receptor signaling pathway via STAT	45	0.560711	1.64259	0.000794768	0.036382	0.0316847	1015	tags=58%, list=27%, signal=42%	PTPRC/IL6R/TNFRSF1A/CYP1B1/CRLF3/CCR2/STAT3/STAT6/TGFB1/STAT5A/IFNAR1/CTR9/PARP9/HCLS1/IL6ST/CD300A/CSF2RB/PTK2B/NMI/IFNAR2/LYN/JAK2/CSF2RA/OCIAD1/JAK1/CSF1R	Up-regulated	Classical.Monocytes
CC	GO:0030312	external encapsulating structure	54	0.553787	1.66651	0.000326183	0.0223633	0.019476	644	tags=39%, list=17%, signal=33%	VCAN/S100A9/MEGF9/FCN1/EMILIN2/SERPINA1/CTSH/S100A8/ANXA2/FGL2/SERPINB9/ERBIN/SERPINB1/SERPINB6/TGFB1/ANXA2P2/CRISPLD2/GLG1/CTSC/PKM/MMP25	Up-regulated	Classical.Monocytes
CC	GO:0031012	extracellular matrix	54	0.553787	1.66651	0.000326183	0.0223633	0.019476	644	tags=39%, list=17%, signal=33%	VCAN/S100A9/MEGF9/FCN1/EMILIN2/SERPINA1/CTSH/S100A8/ANXA2/FGL2/SERPINB9/ERBIN/SERPINB1/SERPINB6/TGFB1/ANXA2P2/CRISPLD2/GLG1/CTSC/PKM/MMP25	Up-regulated	Classical.Monocytes
MF	GO:0031406	carboxylic acid binding	25	0.641843	1.7093	0.000573676	0.0299038	0.0260428	828	tags=52%, list=22%, signal=41%	S100A9/FCN1/S100A8/SIGLEC10/SIGLEC14/IGF2R/PYGL/RARA/RARS1/SIGLEC9/ST8SIA4/ACOX1/PSAP	Up-regulated	Classical.Monocytes
BP	GO:0050817	coagulation	58	0.563295	1.7138	0.000129294	0.0121008	0.0105384	998	tags=50%, list=27%, signal=37%	MAPK14/FCER1G/F5/MYH9/EMILIN2/SERPINA1/TLN1/RAB27A/ANXA2/PRKCD/ACTB/CD36/WAS/FERMT3/SYK/TLR4/ILK/FLNA/AP3B1/IL6ST/PTPN6/VCL/STXBP3/LYN/JAK2/F11R/PLEK/PSEN1/PIK3CB	Up-regulated	Classical.Monocytes
BP	GO:0071402	cellular response to lipoprotein particle stimulus	12	0.75394	1.74229	0.000790155	0.036382	0.0316847	609	tags=67%, list=16%, signal=56%	FCER1G/CD68/CD36/SYK/TLR4/TLR6/ITGB1/MIA3	Up-regulated	Classical.Monocytes
BP	GO:0007599	hemostasis	60	0.579823	1.77195	2.79839e-05	0.00397372	0.00346066	635	tags=40%, list=17%, signal=34%	NFE2/MAPK14/FCER1G/F5/MYH9/EMILIN2/SERPINA1/TLN1/RAB27A/ANXA2/PRKCD/ACTB/CD36/WAS/FERMT3/FLI1/SYK/TLR4/ILK/FLNA/AP3B1/IL6ST/PTPN6/VCL	Up-regulated	Classical.Monocytes
MF	GO:0004888	transmembrane signaling receptor activity	102	0.562124	1.81288	1.89256e-07	5.56683e-05	4.84808e-05	1056	tags=59%, list=29%, signal=43%	PLXNC1/PTPRC/LILRB3/TLR8/FCER1G/P2RY13/FPR2/CCR1/OSCAR/CR1/SORT1/CX3CR1/CTSH/IL6R/LILRA5/ANTXR2/IGSF6/TNFRSF1A/S1PR4/ADGRE2/FPR1/MR1/HRH2/CCR2/LPAR6/FCGR2A/IL4R/IL17RA/NFAM1/IGF2R/TLR4/IFNAR1/TLR6/TLR1/LILRA2/IL6ST/PTPN6/CD300A/IFNGR1/PECAM1/SPN/PLXNB2/LILRA1/CSF2RB/SCARB2/ITGAL/PTK2B/FAS/IFNAR2/GPR65/LILRB1/CSF2RA/SEMA4D/TGFBR2/CRCP/IFNGR2/CLEC4A/CSF1R/INTS6/PTAFR	Up-regulated	Classical.Monocytes
BP	GO:0055094	response to lipoprotein particle	11	0.803212	1.81754	0.00036615	0.0239334	0.0208433	609	tags=73%, list=16%, signal=61%	FCER1G/CD68/CD36/SYK/TLR4/TLR6/ITGB1/MIA3	Up-regulated	Classical.Monocytes
BP	GO:0031638	zymogen activation	18	0.753163	1.88951	4.99618e-05	0.00571508	0.00497719	161	tags=33%, list=4%, signal=32%	NLRC4/APAF1/CTSH/IFI16/ANXA2/ENO1	Up-regulated	Classical.Monocytes

## Sheet: CD8.T.Cells
ONTOLOGY	ID	Description	setSize	enrichmentScore	NES	pvalue	p.adjust	qvalue	rank	leading_edge	core_enrichment	Expression	CellType
CC	GO:0022626	cytosolic ribosome	86	-0.864361	-3.54053	5.22457e-36	1.84532e-32	1.80825e-32	137	tags=57%, list=5%, signal=56%	RPS10/RPS15/RPL7/RPL10/RPL6/RPL35/RPL23/RPS8/RPL7A/RPL36A/RPL10A/RPS4X/RPL36AL/RPL31/RPL19/RPL38/RPS26/RPL27A/RPLP2/RPL34/RPL24/RPL35A/RPS19/RPS16/RPLP0/RPS20/RPL37A/RPL12/RPS15A/RPS21/RPL21/RPS27A/RPS24/RPL17/RPS6/RPS13/RPLP1/RPL32/RPL26/RPL13A/RPS17/RPL37/RPS25/RPL30/RPS23/FAU/RPS12/RPS29/RPL9	Down-regulated	CD8.T.Cells
MF	GO:0003735	structural constituent of ribosome	101	-0.773547	-3.09705	4.01519e-27	7.09083e-24	6.94839e-24	137	tags=48%, list=5%, signal=47%	RPS15/RPL7/RPL10/RPL6/RPL35/RPL23/RPS8/RPL7A/RPL36A/RPL10A/RPS4X/RPL36AL/RPL31/RPL19/RPL38/RPS26/RPL27A/RPLP2/RPL34/RPL24/RPL35A/RPS19/RPS16/RPLP0/RPS20/RPL37A/RPL12/RPS15A/RPS21/RPL21/RPS27A/RPS24/RPL17/RPS6/RPS13/RPLP1/RPL32/RPL26/RPL13A/RPS17/RPL37/RPS25/RPL30/RPS23/FAU/RPS12/RPS29/RPL9	Down-regulated	CD8.T.Cells
BP	GO:0002181	cytoplasmic translation	123	-0.695867	-2.87569	3.21804e-23	2.84153e-20	2.78445e-20	137	tags=39%, list=5%, signal=39%	RPS15/RPL7/RPL10/RPL6/RPL35/RPL23/RPS8/RPL7A/RPL36A/RPL10A/RPS4X/RPL31/RPL19/RPL38/RPS26/RPL27A/RPLP2/RPL34/RPL24/RPL35A/RPS19/RPS16/PABPC1/RPLP0/RPS20/RPL37A/RPL12/RPS15A/RPS21/RPL21/RPS27A/RPS24/RPL17/RPS6/RPS13/RPLP1/RPL32/RPL26/RPL13A/RPS17/RPL37/RPS25/RPL30/RPS23/FAU/RPS12/RPS29/RPL9	Down-regulated	CD8.T.Cells
MF	GO:0097367	carbohydrate derivative binding	432	0.460608	1.46717	1.99178e-07	6.39542e-05	6.26695e-05	905	tags=38%, list=30%, signal=31%	GIMAP7/GIMAP4/GIMAP5/GIMAP1/PTPRC/SLFN5/GVINP1/DGKA/PIM1/TOP2B/HSPD1/PRKACB/DDX17/CHD3/TUBB/MAP4K4/PIM2/GIMAP8/NLRC3/SELL/STK38/ANXA6/STK4/ACTR3/HSPA8/LONP2/GIMAP6/GBP4/RHOT1/THRAP3/CCT5/ATM/JAK3/RALA/SMG1/ACTR2/SMARCAD1/CSNK1A1/SMARCA5/CHD6/DDX18/HSP90AB1/HSPH1/MAP2K4/GBP1/CCT6A/NIN/EIF4G1/DNAJA1/HNRNPU/RAB10/BAZ1B/ATAD1/SARS1/UBE2L3/SMC3/PAPOLA/EIF2S3/PRKAR1A/PKM/PDK3/GNL3L/STK17A/XRCC5/IGF1R/T…	Up-regulated	CD8.T.Cells
BP	GO:0051052	regulation of DNA metabolic process	156	0.516927	1.5889	2.1426e-05	0.00360364	0.00353126	863	tags=48%, list=29%, signal=36%	PTPRC/H1-3/IL7R/MYC/TRIP12/ZNF91/RIF1/DKC1/KMT2A/PPP4R3B/FUS/CCT5/ATM/SMG1/ACTR2/SMARCAD1/SMARCA5/SUPT20H/HSP90AB1/MAP2K4/CCT6A/HNRNPU/KMT5B/CTC1/PTGES3/BRD8/SMC3/GNL3L/XRCC5/YY1/IGF1R/UBR5/IL27RA/ATR/WAS/HNRNPD/YLPM1/THOC1/INO80D/USP1/ANKRD17/CCT3/RPA2/PARP1/STAT6/KDM1A/NBN/PBRM1/PDS5A/HMGB1/ZBTB38/SMARCA4/DFFA/PIK3CA/SMCHD1/CCT4/MPHOSPH8/EP400/HNRNPC/CCT7/WAPL/H1-4/TTF1/MRNIP/NAT10/RAD50/MEAF6/…	Up-regulated	CD8.T.Cells
BP	GO:0002312	B cell activation involved in immune response	25	0.725662	1.80657	0.00010177	0.0156283	0.0153144	592	tags=52%, list=20%, signal=42%	PTPRC/HSPD1/CD40LG/RIF1/KMT5B/DOCK11/IL27RA/DOCK10/PHF14/THOC1/ITFG2/STAT6/NBN	Up-regulated	CD8.T.Cells

## Sheet: CD4.T.Cells
ONTOLOGY	ID	Description	setSize	enrichmentScore	NES	pvalue	p.adjust	qvalue	rank	leading_edge	core_enrichment	Expression	CellType
CC	GO:0022626	cytosolic ribosome	83	-0.780016	-3.20701	5.15214e-24	1.52761e-20	1.41223e-20	313	tags=66%, list=17%, signal=58%	FAU/RPS21/RPSA/RPL6/RPL23A/RPL19/RPL35A/RPL27/RPL3/RACK1/RPS27A/RPL29/RPL39/RPS14/RPL24/RPS25/RPS3/RPS19/UBA52/RPS24/RPL21/RPS4X/RPL10/RPL7/RPS26/RPL27A/RPL18/RPLP1/RPL13/RPL18A/RPS16/RPL37A/RPL28/RPS17/RPL37/RPL7A/RPL9/RPLP0/RPS15A/RPL13A/RPS6/RPL32/RPL17/RPS8/RPL36/RPL12/RPS20/RPL35/RPL34/RPL30/RPS13/RPL11/RPS23/RPS29/RPS12	Down-regulated	CD4.T.Cells
MF	GO:0003735	structural constituent of ribosome	83	-0.762631	-3.13553	3.85592e-22	2.8582e-19	2.64232e-19	313	tags=65%, list=17%, signal=57%	FAU/RPS21/RPSA/RPL6/RPL23A/RPL19/RPL35A/RPL27/RPL3/RPS27A/RPL29/RPL39/RPS14/RPL24/RPS25/RPS3/RPS19/UBA52/RPS24/RPL21/RPS4X/RPL10/RPL7/RPS26/RPL27A/RPL18/RPLP1/RPL13/RPL18A/RPS16/RPL37A/RPL28/RPS17/RPL37/RPL7A/RPL9/RPLP0/RPS15A/RPL13A/RPS6/RPL32/RPL17/RPS8/RPL36/RPL12/RPS20/RPL35/RPL34/RPL30/RPS13/RPL11/RPS23/RPS29/RPS12	Down-regulated	CD4.T.Cells
BP	GO:0002181	cytoplasmic translation	107	-0.707042	-3.03647	3.06327e-22	2.8582e-19	2.64232e-19	313	tags=57%, list=17%, signal=50%	FAU/RPS21/RPSA/RPL6/RPL23A/RPL19/RPL35A/RPL27/RPL3/RACK1/RPS27A/EIF3D/RPL29/RPL39/CNBP/RPS14/RPL24/RPS25/NEMF/RPS3/RPS19/UBA52/RPS24/RPL21/RPS4X/RPL10/RPL7/RPS26/RPL27A/RPL18/RPLP1/RPL13/RPL18A/RPS16/EIF3H/RPL37A/RPL28/RPS17/EIF5/RPL37/RPL7A/RPL9/RPLP0/RPS15A/RPL13A/RPS6/RPL32/RPL17/RPS8/RPL36/RPL12/RPS20/RPL35/RPL34/RPL30/RPS13/RPL11/EIF3E/RPS23/RPS29/RPS12	Down-regulated	CD4.T.Cells
MF	GO:0019843	rRNA binding	26	-0.648008	-2.12211	6.46956e-05	0.0045672	0.00422224	283	tags=46%, list=15%, signal=40%	RPL23A/RPL3/RPS14/RPS3/RPS4X/NPM1/RPL37/RPL9/RPLP0/RPL12/RPS13/RPL11	Down-regulated	CD4.T.Cells
BP	GO:0042254	ribosome biogenesis	65	-0.504612	-1.99055	2.19633e-05	0.00180892	0.0016723	311	tags=40%, list=17%, signal=35%	RPS21/RPSA/RPL6/RPL23A/RPL35A/RPL27/DDX3X/RPS14/KRR1/RPL24/RPS25/DDX27/RPS19/RPS24/RPL10/RPL7/NPM1/RPS16/RPS17/RSL1D1/RPL7A/RPLP0/RPS6/RPS8/RPL35/RPL11	Down-regulated	CD4.T.Cells
BP	GO:0006364	rRNA processing	45	-0.533528	-1.95886	0.000137456	0.00885992	0.00819073	203	tags=38%, list=11%, signal=35%	RPL35A/RPL27/RPS14/KRR1/RPS25/DDX27/RPS19/RPS24/RPL7/RPS16/RPS17/RSL1D1/RPL7A/RPS6/RPS8/RPL35/RPL11	Down-regulated	CD4.T.Cells
BP	GO:0007166	cell surface receptor signaling pathway	356	0.402811	1.37093	0.00130168	0.0419509	0.0387823	388	tags=25%, list=21%, signal=25%	FCER1G/SLA/TLR4/SORL1/FPR1/FCGR3B/TNFSF10/PTPRC/SPI1/BTN3A2/IGSF6/FCGR2A/MNDA/CASP4/FCN1/LILRB3/CSF2RB/DGKD/ACSL1/BIRC2/TRABD2A/MAPK14/CD27/CR1/PTAFR/TNFRSF1A/TNFRSF10C/BCL2A1/STK4/RAC1/ADAR/SIRPB1/CHURC1/IL17RA/FFAR2/FCGR3A/TXNIP/PAK1/FPR2/HCK/JAK3/MLLT3/IL1R2/LYN/NMI/PPP3CA/PIK3CD/IFITM1/TRIM56/RAB14/DTX3L/FGR/CARD16/TRAT1/C5AR1/LRRK2/IQGAP1/TBL1XR1/ITGA6/RASSF2/IL6R/RC3H1/IL27RA/CASP1/SESN3/CS…	Up-regulated	CD4.T.Cells
BP	GO:0044419	biological process involved in interspecies interaction between organisms	308	0.409903	1.38727	0.00111817	0.0390044	0.0360584	370	tags=25%, list=20%, signal=24%	S100A8/FCER1G/SLA/S100A9/HLA-F/TLR4/ALPK1/TRIM25/PYGL/S100A12/PTPRC/DNAJC3/SPI1/MNDA/CASP4/FCN1/CSF2RB/BIRC2/MAPK14/CHMP4A/CR1/PTAFR/TNFRSF1A/TLR1/TLR6/EPRS1/ADAR/IL17RA/MEFV/FFAR2/FCGR3A/RAB27A/LYZ/PAK1/FPR2/SLC11A1/HCK/JAK3/AIF1/LYN/NMI/PIK3CD/HLA-B/IFITM1/TRIM56/RAB14/TRIM22/DTX3L/FGR/CARD16/DHX9/C5AR1/ST13/HSPD1/ITCH/IL6R/COTL1/SELPLG/IL27RA/CASP1/ITGAX/SP100/DDX17/IFITM2/HLA-A/VIM/USP15/IL4R…	Up-regulated	CD4.T.Cells
BP	GO:0009888	tissue development	188	0.445258	1.47107	0.00132559	0.0422621	0.03907	572	tags=43%, list=30%, signal=33%	EGLN1/SORL1/PTPRC/BASP1/SPI1/LBH/PIM1/MAPK14/AKAP13/MEGF9/TNFRSF1A/MYADM/RXRA/VASP/STK4/RAC1/TXNIP/RFLNB/PAK1/ATP2B1/MTPN/HCK/MLLT3/ALOX5/SNX10/PPP3CA/LUC7L/PIK3CD/FGR/TRIOBP/IQGAP1/TBL1XR1/MYC/ITGA6/IL6R/TCIRG1/HNRNPU/MACROH2A1/ITGAX/DDX17/CXCR2/SRGN/VIM/CFLAR/IKBKB/LEF1/PECAM1/ADD1/AKIRIN1/ZFP36L1/KDM6B/ATM/ACTB/SOS1/GPCPD1/WDR1/PGK1/CAT/RIPOR2/PTEN/KRAS/EP300/RGS2/PPP2CA/ITGB1/PFN1/SEMA4D/VEZF…	Up-regulated	CD4.T.Cells
MF	GO:0005102	signaling receptor binding	179	0.459101	1.51294	0.00113873	0.0392596	0.0362943	368	tags=27%, list=20%, signal=24%	S100A8/SLA/S100A9/HLA-F/TLR4/JAML/FPR1/TRIM25/TNFSF10/S100A12/PTPRC/PROK2/BTN3A2/FCN1/CKLF/ACTN1/TLR1/TLR6/IL17RA/MYL12A/FPR2/HCK/USP4/JAK3/PRMT2/LYN/HLA-B/FGR/TRAT1/ITCH/ITGA6/IL6R/ASXL2/DNAJA1/SELPLG/CALM3/IL27RA/ITGAX/USP33/HLA-A/USP15/PILRB/CLTC/TAPBP/CFLAR/IKBKB/SNX1/PICALM/TYMP	Up-regulated	CD4.T.Cells
BP	GO:0016192	vesicle-mediated transport	215	0.462289	1.54399	0.000110068	0.00741705	0.00685684	484	tags=34%, list=26%, signal=29%	FCER1G/RTN3/HLA-F/TLR4/SORL1/PTPRC/ARFGEF1/SPI1/AP5B1/FCN1/DGKD/CHMP4A/PTAFR/RALBP1/RAC1/SIRPB1/LRP10/CDC42SE1/FCGR3A/RAB27A/BIN2/GOLGA7/TBC1D14/PAK1/FPR2/SH3KBP1/SLC11A1/HCK/SNX18/AIF1/SNX10/CAP1/LYN/PPP3CA/NUMB/PIK3CD/RAB14/DTX3L/FGR/LRRK2/GDI2/CALM3/WASHC4/ANKRD13A/STX3/CXCR2/PRKCB/NCF4/USP33/ARHGAP25/STXBP5/USO1/IL4R/CLTC/TAPBP/RAB31/SNX1/PECAM1/PICALM/CHMP1B/IGF2R/ACTB/PPT1/CYBA/EHD1/SNAP23/…	Up-regulated	CD4.T.Cells
BP	GO:0001816	cytokine production	158	0.476378	1.55114	0.00025133	0.0149039	0.0137782	332	tags=30%, list=18%, signal=27%	FCER1G/HLA-F/TLR4/SORL1/PTPRC/BTN3A2/MNDA/FCN1/MAPK14/CR1/PTAFR/TLR1/TLR6/RAC1/IL17RA/MEFV/FFAR2/FCGR3A/NFATC2IP/ATP2B1/SLC11A1/JAK3/IL1R2/AIF1/ALOX5/LYN/NMI/PIK3CD/HLA-B/TRIM56/FGR/CARD16/DHX9/C5AR1/HSPD1/ITCH/LRRK2/IQGAP1/MBP/IL6R/IL27RA/CASP1/BCL6/SRGN/HLA-A/SERPINB1/VSIR/IL4R	Up-regulated	CD4.T.Cells
BP	GO:0051090	regulation of DNA-binding transcription factor activity	68	0.535287	1.60943	0.00129893	0.0419509	0.0387823	223	tags=28%, list=12%, signal=26%	S100A8/EGLN1/S100A9/TLR4/TRIM25/S100A12/SPI1/PIM1/TLR6/MTPN/HCK/PRMT2/PPP3CA/TRIM22/CARD16/DHX9/ITCH/TAF1/COMMD6	Up-regulated	CD4.T.Cells
CC	GO:0031224	intrinsic component of membrane	335	0.487982	1.65441	1.30197e-08	2.27079e-06	2.09928e-06	478	tags=36%, list=25%, signal=33%	FCER1G/RTN3/HLA-F/TLR4/SORL1/JAML/FPR1/FCGR3B/TNFSF10/AQP9/PTPRC/BTN3A2/IGSF6/FCGR2A/LILRB3/CSF2RB/ACSL1/BIRC2/VNN2/TRABD2A/CD27/CKLF/MEGF9/CR1/PTAFR/TNFRSF1A/TNFRSF10C/MYADM/TLR1/LST1/TLR6/TOR1AIP2/RAC1/KCNJ15/SIRPB1/IL17RA/GHITM/FFAR2/LRP10/FCGR3A/MGAM/GOLGA7/GIMAP5/SLC25A37/FPR2/ATP2B1/SLC11A1/APLP2/MMP25/IL1R2/SSR1/LYN/GIMAP1/RNF149/TMEM154/HLA-B/IFITM1/CLIC1/TRAT1/CCPG1/C5AR1/MGAT1/HSPD1/ITG…	Up-regulated	CD4.T.Cells
MF	GO:0008289	lipid binding	92	0.537569	1.66773	0.000163844	0.0103361	0.00955543	542	tags=52%, list=29%, signal=39%	S100A8/S100A9/TLR4/FCGR3B/ZRANB2/DGKD/CHMP4A/PTAFR/TLR1/TLR6/RXRA/FFAR2/BIN2/DAPP1/DGKA/ACOX1/HCK/SNX18/SNX10/LYN/HADHA/HSPD1/IQGAP1/ATP5MC3/CYTH4/STX3/ARHGAP26/NCF4/ASAP1/SNX1/PICALM/CLEC4E/IGF2R/PPT1/CERT1/MME/APOL6/TARDBP/PTEN/ARHGAP9/HSPA8/CD55/PFN1/PREX1/VPS36/PSAP/TLN1/CHMP3	Up-regulated	CD4.T.Cells
CC	GO:0099503	secretory vesicle	186	0.511429	1.68747	1.44205e-06	0.000185899	0.000171858	511	tags=42%, list=27%, signal=34%	S100A8/FCER1G/S100A9/FPR1/FCGR3B/PYGL/S100A12/PTPRC/DNAJC3/FCGR2A/MNDA/FCN1/LILRB3/MAPK14/ACTN1/CR1/PTAFR/GCA/RAC1/SIRPB1/RAB27A/BIN2/LYZ/MGAM/GOLGA7/FPR2/ATP2B1/SLC11A1/APLP2/MMP25/ALOX5/SNX10/CAP1/ARPC5/HLA-B/RAB14/FGR/C5AR1/HSPD1/LRRK2/IQGAP1/COTL1/TCIRG1/GDI2/CALM3/SERPINA1/STX3/PDAP1/ITGAX/CXCR2/SRGN/SERPINB1/STXBP5/PSMB1/RAB31/PECAM1/PICALM/ATP11B/IGF2R/LAMP2/PPT1/CYBA/CAT/SNAP23/CTSC/MME/T…	Up-regulated	CD4.T.Cells
BP	GO:0043406	positive regulation of MAP kinase activity	14	0.747943	1.69298	0.00150245	0.0464037	0.0428988	219	tags=50%, list=12%, signal=45%	TLR4/S100A12/PTPRC/AKAP13/TLR6/PAK1/LRRK2	Up-regulated	CD4.T.Cells
BP	GO:0045087	innate immune response	168	0.523596	1.71381	1.23862e-06	0.000166932	0.000154323	215	tags=24%, list=11%, signal=24%	S100A8/FCER1G/SLA/S100A9/HLA-F/TLR4/ALPK1/TRIM25/S100A12/SPI1/MNDA/CASP4/FCN1/BIRC2/CR1/TLR1/TLR6/EPRS1/ADAR/IL17RA/MEFV/FFAR2/FCGR3A/RAB27A/PAK1/FPR2/SLC11A1/HCK/JAK3/AIF1/LYN/NMI/PIK3CD/HLA-B/IFITM1/TRIM56/TRIM22/DTX3L/FGR/DHX9/ITCH	Up-regulated	CD4.T.Cells
BP	GO:0002704	negative regulation of leukocyte mediated immunity	18	0.741542	1.76176	0.0005233	0.0238705	0.0220676	342	tags=50%, list=18%, signal=41%	HLA-F/PTPRC/SPI1/CR1/JAK3/HLA-B/BCL6/HLA-A/IL7R	Up-regulated	CD4.T.Cells
MF	GO:0031406	carboxylic acid binding	12	0.833212	1.81542	6.89753e-05	0.00475609	0.00439686	134	tags=58%, list=7%, signal=55%	S100A8/EGLN1/S100A9/PYGL/FCN1/RXRA/ACOX1	Up-regulated	CD4.T.Cells
MF	GO:0004888	transmembrane signaling receptor activity	69	0.617708	1.8607	3.81497e-06	0.000367692	0.00033992	383	tags=46%, list=20%, signal=38%	FCER1G/TLR4/SORL1/FPR1/FCGR3B/PTPRC/IGSF6/FCGR2A/LILRB3/CSF2RB/CD27/CR1/PTAFR/TNFRSF1A/TNFRSF10C/TLR1/TLR6/IL17RA/FFAR2/FCGR3A/FPR2/IL1R2/C5AR1/IL6R/IL27RA/CXCR2/IL4R/IL7R/PECAM1/IFNAR2/P2RY13/IGF2R	Up-regulated	CD4.T.Cells

## Sheet: B.Cells
ONTOLOGY	ID	Description	setSize	enrichmentScore	NES	pvalue	p.adjust	qvalue	rank	leading_edge	core_enrichment	Expression	CellType
CC	GO:0022625	cytosolic large ribosomal subunit	50	-0.657284	-2.69278	1.27337e-09	4.01876e-06	4.01876e-06	290	tags=48%, list=13%, signal=43%	RPL26/RPL24/RPL36AL/RPL35A/RPL19/RPL38/RPLP2/RPL37A/RPL37/RPLP0/RPL7A/RPL8/RPLP1/RPL30/RPL18/RPL13A/RPL34/RPL3/RPL21/RPL23/RPL12/RPL9/RPL32/RPL17	Down-regulated	B.Cells

## Sheet: Eosinophils
ONTOLOGY	ID	Description	setSize	enrichmentScore	NES	pvalue	p.adjust	qvalue	rank	leading_edge	core_enrichment	Expression	CellType
CC	GO:0015934	large ribosomal subunit	47	-0.899043	-4.24704	1.11282e-29	4.00615e-26	3.59617e-26	241	tags=81%, list=9%, signal=75%	RPL23A/RPL6/RPL7A/RPL21/RPL28/RPL18/RPL17/RPL27A/RPL8/RPL24/RPLP1/RPL4/RPL38/RPL5/NPM1/RPL26/RPL23/RPL29/RPL3/RPL36A/RPL35A/RPLP0/RPL30/RPL19/RPL37/RPL13A/RPL10/RPL11/RPL32/RPL31/RPL35/RPL37A/RPL9/RPL13/RPLP2/RPL12/RPL10A/RPL34	Down-regulated	Eosinophils
MF	GO:0019843	rRNA binding	25	-0.841253	-3.21998	1.70111e-11	8.74858e-09	7.85326e-09	169	tags=72%, list=6%, signal=68%	RPS3/NOP53/RPL8/RPS11/RPS4Y1/RPS4X/RPL5/NPM1/RPL23/RPL3/RPS14/RPLP0/RPL37/RPS18/RPS13/RPL11/RPL9/RPL12	Down-regulated	Eosinophils
BP	GO:0042254	ribosome biogenesis	59	-0.600197	-3.08649	2.01554e-11	9.06993e-09	8.14172e-09	255	tags=49%, list=9%, signal=46%	RPS28/RPS27/RPL23A/RPL6/RPL7A/RPS17/GNL3L/RIOK3/RPS24/RPS15/NOP53/RPL24/RPS8/RPL38/RPL5/RPS21/NPM1/RPL26/RPS16/RPS14/RPL35A/RPLP0/RPS19/RPL10/RPS25/RPL11/RPL35/RPL10A/RPS6	Down-regulated	Eosinophils
BP	GO:0006364	rRNA processing	41	-0.634092	-2.72302	8.29477e-09	2.13294e-06	1.91466e-06	255	tags=51%, list=9%, signal=47%	RPS28/RPS27/RPL7A/RPS17/RIOK3/RPS24/RPS15/NOP53/RPS8/RPL5/RPS21/RPL26/RPS16/RPS14/RPL35A/RPS19/RPS25/RPL11/RPL35/RPL10A/RPS6	Down-regulated	Eosinophils
BP	GO:0006414	translational elongation	16	-0.684846	-2.32314	9.47645e-05	0.0136461	0.0122496	91	tags=44%, list=3%, signal=43%	EEF1G/RPLP1/EEF1A1/RACK1/RPLP2/EEF1B2/EEF2	Down-regulated	Eosinophils
BP	GO:0051444	negative regulation of ubiquitin-protein transferase activity	10	-0.803166	-2.29148	0.000220284	0.0264341	0.0237289	124	tags=60%, list=4%, signal=58%	RPS15/RPL5/RPL23/RPL37/RPL11/RPS20	Down-regulated	Eosinophils
BP	GO:1901798	positive regulation of signal transduction by p53 class mediator	12	-0.752361	-2.27225	0.000232251	0.0269711	0.0242109	124	tags=50%, list=4%, signal=48%	RPS15/RPL26/RPL23/RPL37/RPL11/RPS20	Down-regulated	Eosinophils
MF	GO:0055106	ubiquitin-protein transferase regulator activity	10	-0.76956	-2.1956	0.00054835	0.0443291	0.0397925	124	tags=60%, list=4%, signal=58%	RPS15/RPL5/RPL23/RPL37/RPL11/RPS20	Down-regulated	Eosinophils
MF	GO:0045182	translation regulator activity	52	-0.412944	-1.95084	0.000429602	0.0385294	0.0345863	207	tags=23%, list=7%, signal=22%	EIF3F/EIF5/EIF2AK2/AGO3/EIF2S3/EEF1G/EEF1A1/RPS14/RPL10/PABPC1/EEF1B2/EEF2	Down-regulated	Eosinophils
BP	GO:0006955	immune response	419	0.416691	1.28454	0.000554114	0.0443291	0.0397925	815	tags=37%, list=29%, signal=31%	ALOX15/NCF2/SIGLEC10/ADGRE2/IFITM1/LST1/CD24/CTSC/PTAFR/MYB/SWAP70/GAPT/FCGR2A/PTGDR2/ACTR3/IL18R1/MSRB1/IL5RA/HMGN2/KLHL6/ACTG1/HRH2/LFNG/CYSLTR1/IFNAR1/ANXA1/CFD/PAK1/APBB1IP/IFITM2/LYST/ADGRE1/PRKCD/SPI1/JAK2/RC3H1/TNFSF14/ACTR2/HLA-B/LTB/CCR3/CSF2RB/CR1/RBPJ/PIK3R6/SNAP23/VIM/VAV1/CORO1A/NFATC2/NOTCH2/NCKAP1L/C3AR1/VSIR/ATP7A/IL17RA/MBP/BAX/PTPRC/PIK3AP1/PTPRJ/STX4/RAB29/GPI/ARID5A/HLA-H/MAPK…	Up-regulated	Eosinophils
BP	GO:0009653	anatomical structure morphogenesis	460	0.426096	1.31673	5.02327e-05	0.0082199	0.00737869	936	tags=43%, list=33%, signal=34%	NKX3-1/PLXNC1/LST1/DIP2A/PIM1/VASP/HK2/ACTB/MYADM/FGD3/KLHL6/ACTG1/RIPOR2/CAP1/PRKAR1A/MEF2A/NBEAL2/RNF6/NIN/ITGAX/ITGB7/LFNG/CYSLTR1/FGD2/ANXA1/PFN1/KDM6B/PTEN/MYL12A/PAK1/SDCCAG8/AGGF1/ID2/SPI1/RC3H1/KLF2/DIAPH1/TNFSF14/MTPN/ACTR2/EPN2/CCR3/RBPJ/PIK3R6/CNOT2/MBOAT7/LGALS8/CORO1A/GCNT1/SMPD3/BTBD7/NFATC2/TMOD2/NOTCH2/FRY/NCKAP1L/C3AR1/DNM2/ILK/FLNA/ATP7A/GDI1/MBP/NUMB/BAX/PDE3B/ARAP1/KRIT1/CD9/G…	Up-regulated	Eosinophils
BP	GO:0007155	cell adhesion	272	0.436319	1.32515	0.000627384	0.0480549	0.043137	440	tags=25%, list=16%, signal=24%	ALOX15/SIGLEC10/ADGRE2/PLXNC1/DSC2/CD24/JAML/SIGLEC8/PTAFR/MYB/SWAP70/ACTB/MYADM/ACTG1/RIPOR2/PRKAR1A/SELPLG/ITGAX/ITGB7/TLN1/ANXA1/PTEN/MYL12A/APBB1IP/ADGRE1/AGGF1/PRKCD/AKNA/SPI1/JAK2/RC3H1/ENTPD1/TNFSF14/SLK/CCR3/CR1/PIK3R6/VAV1/CORO1A/GCNT1/NCKAP1L/VSIR/DNM2/ILK/RASAL3/FLNA/MBP/PPP1R12A/PTPRC/PTPRJ/STX4/PDE3B/CD9/MAPK14/FES/ICAM3/SYK/RHOB/CYFIP2/CD300A/PLEK/SIRPA/VCL/HCK/SEMA4D/PSTPIP1/CD46/R…	Up-regulated	Eosinophils
BP	GO:0048870	cell motility	336	0.441677	1.3529	5.92239e-05	0.00926982	0.00832116	828	tags=40%, list=30%, signal=32%	PADI2/ADGRE2/PLXNC1/IFITM1/CD24/JAML/PTAFR/SWAP70/ACTR3/ACTB/MYADM/ACTG1/RIPOR2/CAP1/SELPLG/ITGAX/ITGB7/ANXA1/PFN1/PTEN/CAMK1D/ABHD2/PAK1/SDCCAG8/LYST/CKLF/PRKCD/SPI1/JAK2/DIAPH1/TNFSF14/PSTPIP2/SLK/CCR3/MBOAT7/LGALS8/ZNF609/VAV1/CORO1A/GCNT1/SMPD3/NFATC2/BIN2/NCKAP1L/C3AR1/VSIR/SORD/ILK/FLNA/ARPC5/ATP7A/IL17RA/NUMB/BAX/PTPRC/PTPRJ/STX4/GNAI2/KRIT1/NLRP12/CD9/GPI/RIN3/STAT3/FES/SYNE2/SYK/GPSM3/RH…	Up-regulated	Eosinophils
BP	GO:0040011	locomotion	280	0.448483	1.36379	0.000198386	0.0246272	0.0221069	783	tags=40%, list=28%, signal=32%	PADI2/ADGRE2/PLXNC1/IFITM1/JAML/PTAFR/SWAP70/VASP/PTGDR2/MYADM/ACTG1/RIPOR2/ITGAX/CYSLTR1/ANXA1/PFN1/PTEN/CAMK1D/ABHD2/PAK1/LYST/CKLF/PRKCD/SPI1/JAK2/DIAPH1/TNFSF14/SLK/CCR3/ZNF609/VAV1/CORO1A/GCNT1/SMPD3/NOTCH2/BIN2/NCKAP1L/C3AR1/VSIR/FLNA/ATP7A/IL17RA/NUMB/PTPRC/PTPRJ/STX4/GNAI2/KRIT1/CD9/GPI/MAPK14/RIN3/STAT3/FES/SYNE2/SYK/GPSM3/RHOB/CD300A/PDCD10/VCL/CCL23/SEMA4D/TGFBR2/SEMA7A/EVL/TGFBR1/WDR1…	Up-regulated	Eosinophils
BP	GO:0001775	cell activation	294	0.465835	1.41912	7.15545e-06	0.00143109	0.00128463	860	tags=43%, list=31%, signal=33%	ADGRE2/LST1/CD24/JAML/CTSC/PTAFR/MYB/SWAP70/GAPT/IL18R1/LYL1/ACTB/ACTG1/RIPOR2/PRKAR1A/SELPLG/TLN1/LFNG/ANXA1/PTEN/MYL12A/APBB1IP/PRKCD/ID2/SPI1/JAK2/RC3H1/TNFSF14/DGKD/CR1/RBPJ/PIK3R6/SNAP23/VAV1/CORO1A/NFATC2/NOTCH2/NCKAP1L/VSIR/ILK/RASAL3/FLNA/ATP7A/IL17RA/BAX/PTPRC/PTPRJ/STX4/SOS2/RAB29/CD9/MAPK14/GNAQ/PURA/IL1RL1/STAT3/FES/SYK/PPP2R3C/DOCK11/TBC1D10C/CD300A/PLEK/SIRPA/CASP8/KMT2E/VCL/RASSF5/…	Up-regulated	Eosinophils
BP	GO:0048646	anatomical structure formation involved in morphogenesis	198	0.483803	1.45721	4.8549e-05	0.0082199	0.00737869	630	tags=40%, list=22%, signal=33%	NKX3-1/PIM1/VASP/HK2/KLHL6/ACTG1/RIPOR2/PRKAR1A/MEF2A/NBEAL2/ITGAX/LFNG/CYSLTR1/ANXA1/PFN1/KDM6B/PTEN/SDCCAG8/AGGF1/RC3H1/KLF2/TNFSF14/MTPN/EPN2/CCR3/RBPJ/PIK3R6/CNOT2/MBOAT7/SMPD3/NFATC2/TMOD2/NOTCH2/C3AR1/FLNA/ATP7A/PDE3B/KRIT1/CD9/GPI/TXNRD1/SLC40A1/FLII/MAPK14/APAF1/STAT3/MED1/SYK/RHOB/CASP8/PDCD10/TCIRG1/SLC12A6/RUNX1/TGFBR2/CTR9/PTPN18/AGTPBP1/TGFBR1/WDR1/TMF1/PANK2/SMAD4/FKBP1A/PIK3CB/PIK3…	Up-regulated	Eosinophils
MF	GO:0005543	phospholipid binding	102	0.51286	1.5036	0.000303948	0.0325687	0.0292357	783	tags=45%, list=28%, signal=34%	ALOX15/PTAFR/TLN1/FGD2/ANXA1/PFN1/CLINT1/SNX20/WIPI1/ESYT1/EPN2/ANXA11/SMPD3/NCF4/SNX6/PAFAH2/BIN2/DAPP1/PCTP/MITD1/ARAP1/KRIT1/FLII/PLCB2/FES/HIP1/CD300A/BTK/ARHGAP9/EXOC1/DENND1B/CHMP2A/SNX14/RAB35/AKT1/PCYT1A/NCF1/ANXA5/OPA1/PSD4/SVIL/DGKA/ABCA1/GSDMB/GSN/OSBPL8	Up-regulated	Eosinophils
MF	GO:0038023	signaling receptor activity	132	0.546781	1.62167	1.4646e-06	0.00031015	0.000278409	812	tags=52%, list=29%, signal=38%	NKX3-1/ADGRE2/PLXNC1/OXER1/SIGLEC8/PTAFR/FCGR2A/PTGDR2/IL18R1/IL5RA/P2RY14/ITGAX/ITGB7/HRH2/CYSLTR1/TM2D1/IFNAR1/ADGRE3/ABHD2/ABCA7/ADGRE1/CCR3/CSF2RB/CR1/NOTCH2/C3AR1/P2RY10/M6PR/IL17RA/PTPRC/S1PR4/IL1RL1/STAT3/CD300A/ADGRG5/SEMA4D/FCGR2C/CD46/TGFBR2/AHR/P2RX1/ANTXR2/TGFBR1/OSCAR/IFNAR2/SEC63/ATP6AP2/IGF1R/RXRA/ITGB2/CNR2/LPAR2/CYSLTR2/CSF2RA/RYK/IL6R/CD302/LILRB2/FCER1G/IFNGR2/ABCA1/SLC20A1/SEC…	Up-regulated	Eosinophils
MF	GO:0060089	molecular transducer activity	132	0.546781	1.62167	1.4646e-06	0.00031015	0.000278409	812	tags=52%, list=29%, signal=38%	NKX3-1/ADGRE2/PLXNC1/OXER1/SIGLEC8/PTAFR/FCGR2A/PTGDR2/IL18R1/IL5RA/P2RY14/ITGAX/ITGB7/HRH2/CYSLTR1/TM2D1/IFNAR1/ADGRE3/ABHD2/ABCA7/ADGRE1/CCR3/CSF2RB/CR1/NOTCH2/C3AR1/P2RY10/M6PR/IL17RA/PTPRC/S1PR4/IL1RL1/STAT3/CD300A/ADGRG5/SEMA4D/FCGR2C/CD46/TGFBR2/AHR/P2RX1/ANTXR2/TGFBR1/OSCAR/IFNAR2/SEC63/ATP6AP2/IGF1R/RXRA/ITGB2/CNR2/LPAR2/CYSLTR2/CSF2RA/RYK/IL6R/CD302/LILRB2/FCER1G/IFNGR2/ABCA1/SLC20A1/SEC…	Up-regulated	Eosinophils
BP	GO:0007599	hemostasis	56	0.581992	1.63262	0.00032055	0.0329709	0.0295967	849	tags=61%, list=30%, signal=43%	ACTB/ACTG1/TLN1/MYL12A/PRKCD/JAK2/ENTPD1/DGKD/VAV1/PAFAH2/ILK/FLNA/CD9/GPI/MAPK14/GNAQ/SYK/FLI1/PLEK/NFE2/VCL/P2RX1/CLIC1/PIK3CB/PIK3CA/FERMT3/ANXA5/F5/DGKA/PLCG2/FCER1G/PTPN6/STXBP3/SERPINA1	Up-regulated	Eosinophils
CC	GO:0005766	primary lysosome	55	0.584653	1.63781	0.000108817	0.0145089	0.0130241	331	tags=33%, list=12%, signal=29%	PADI2/DNAJC3/CTSC/SLCO4C1/CAP1/CKAP4/PRKCD/BRI3/ACTR2/RAB37/ANXA11/SNAP23/GCA/C3AR1/LAMP2/HLA-H/RNASET2/RAB3D	Up-regulated	Eosinophils
CC	GO:0042582	azurophil granule	55	0.584653	1.63781	0.000108817	0.0145089	0.0130241	331	tags=33%, list=12%, signal=29%	PADI2/DNAJC3/CTSC/SLCO4C1/CAP1/CKAP4/PRKCD/BRI3/ACTR2/RAB37/ANXA11/SNAP23/GCA/C3AR1/LAMP2/HLA-H/RNASET2/RAB3D	Up-regulated	Eosinophils
BP	GO:0030518	intracellular steroid hormone receptor signaling pathway	40	0.617771	1.67291	0.000263254	0.0296161	0.0265852	549	tags=35%, list=20%, signal=29%	NKX3-1/PADI2/RNF6/PRMT2/PAK1/JAK2/NCOA4/CNOT2/TADA3/EGLN2/MED1/CALCOCO1/TMF1/WBP2	Up-regulated	Eosinophils
CC	GO:0005887	integral component of plasma membrane	176	0.575307	1.72187	4.2926e-11	1.71704e-08	1.54132e-08	803	tags=51%, list=29%, signal=39%	NCF2/ADGRE2/PLXNC1/PTAFR/FCGR2A/PTGDR2/IL18R1/SLCO4C1/KCNE1/SLC2A3/SELPLG/ITGAX/ITGB7/HRH2/CYSLTR1/TM2D1/IFNAR1/ADGRE3/ADGRE1/JAK2/SLC16A3/ENTPD1/HLA-B/CCR3/CSF2RB/STXBP5/CR1/SLCO3A1/SLC29A1/NCF4/NOTCH2/NCKAP1L/C3AR1/P2RY10/FLNA/M6PR/IL17RA/PTPRC/PTPRJ/EVI2B/CD9/SLC40A1/HLA-H/CACNG8/S1PR4/HVCN1/TSPAN2/ICAM3/SIRPA/KCNAB2/TCIRG1/ADGRG5/SEMA4D/SLC12A6/FCGR2C/CD46/TGFBR2/CALM2/SEMA7A/SLMAP/TNFSF10/P2…	Up-regulated	Eosinophils
BP	GO:0060038	cardiac muscle cell proliferation	12	0.786899	1.78437	0.00049264	0.0412443	0.0370234	489	tags=75%, list=17%, signal=62%	PIM1/PRKAR1A/PTEN/RBPJ/MAPK14/FES/RUNX1/TGFBR2/TGFBR1	Up-regulated	Eosinophils
BP	GO:0120254	olefinic compound metabolic process	11	0.806603	1.7927	0.000438806	0.0385294	0.0345863	45	tags=27%, list=2%, signal=27%	ALOX15/DHRS7/TBXAS1	Up-regulated	Eosinophils

## Sheet: NK.Cells
ONTOLOGY	ID	Description	setSize	enrichmentScore	NES	pvalue	p.adjust	qvalue	rank	leading_edge	core_enrichment	Expression	CellType
CC	GO:0022626	cytosolic ribosome	86	-0.901829	-3.91673	1.32678e-46	4.88124e-43	4.61442e-43	211	tags=72%, list=7%, signal=69%	RPL29/RPL8/RPL41/RPL18A/RPL12/RPL27/RPLP1/RPS27L/RPS11/RPL4/RPS3A/RPS8/RPL10A/RPL23/RPL10/RPL35/RPS7/RPL14/RPS24/RPS16/RPL28/RPS3/RPS26/RPL7A/RPL36/FAU/RPL31/RPS13/RPL6/RPL23A/RPL3/RPL38/RPL34/RPL11/RPL35A/RPL26/RPS27/RPL24/RPS27A/RPL37/RPS17/RPS14/RPS6/RPL19/RPL17/RPL21/RPLP2/RPL27A/RPS19/RPL37A/RPS4X/RPL30/RPL9/RPS21/RPL13A/RPL32/RPS15A/RPS20/RPS23/RPS25/RPS12/RPS29	Down-regulated	NK.Cells
MF	GO:0003735	structural constituent of ribosome	89	-0.886174	-3.78043	9.47801e-44	8.7174e-41	8.24088e-41	216	tags=71%, list=7%, signal=68%	DAP3/RPL29/RPL8/RPL41/RPL18A/RPL12/RPL27/RPLP1/RPS27L/RPS11/RPL4/RPS3A/RPS8/RPL10A/RPL23/RPL10/RPL35/RPS7/RPL14/RPS24/RPS16/RPL28/RPS3/RPS26/RPL7A/RPL36/FAU/RPL31/RPS13/RPL6/RPL23A/RPL3/RPL38/RPL34/RPL11/RPL35A/RPL26/RPS27/RPL24/RPS27A/RPL37/RPS17/RPS14/RPS6/RPL19/RPL17/RPL21/RPLP2/RPL27A/RPS19/RPL37A/RPS4X/RPL30/RPL9/RPS21/RPL13A/RPL32/RPS15A/RPS20/RPS23/RPS25/RPS12/RPS29	Down-regulated	NK.Cells
BP	GO:0002181	cytoplasmic translation	119	-0.819659	-3.77445	9.98138e-43	7.3443e-40	6.94284e-40	211	tags=53%, list=7%, signal=51%	RPL29/RPL8/EIF5/RPL41/RPL18A/EIF3H/RPL12/RPL27/RPLP1/RPS11/RPL4/RPS3A/RPS8/RPL10A/RPL23/RPL10/RPL35/RPS7/RPL14/RPS24/RPS16/RPL28/RPS3/RPS26/RPL7A/RPL36/FAU/RPL31/RPS13/RPL6/RPL23A/RPL3/RPL38/RPL34/RPL11/RPL35A/RPL26/RPS27/RPL24/RPS27A/RPL37/RPS17/RPS14/RPS6/RPL19/RPL17/RPL21/RPLP2/RPL27A/RPS19/RPL37A/RPS4X/RPL30/RPL9/RPS21/RPL13A/RPL32/RPS15A/RPS20/RPS23/RPS25/RPS12/RPS29	Down-regulated	NK.Cells
MF	GO:0019843	rRNA binding	32	-0.770378	-2.68848	1.87218e-09	4.91981e-07	4.65088e-07	243	tags=44%, list=8%, signal=41%	RPS18/RPL8/RPL12/RPS11/RPL23/RPS3/RPS13/RPL23A/RPL3/RPL11/RPL37/RPS14/RPS4X/RPL9	Down-regulated	NK.Cells
BP	GO:0042254	ribosome biogenesis	98	-0.53081	-2.28383	1.7647e-09	4.91981e-07	4.65088e-07	169	tags=30%, list=6%, signal=29%	LYAR/DIS3/NOL8/RPL27/RPS27L/XPO1/RPS8/RPL10A/RPL10/RPL35/RPS7/RPL14/RPS24/RPS16/RPL7A/RPL6/RPL23A/RPL38/RPL11/RPL35A/RPL26/RPS27/RPL24/RPS17/RPS14/RPS6/RPS19/RPS21/RPS25	Down-regulated	NK.Cells
BP	GO:1901798	positive regulation of signal transduction by p53 class mediator	14	-0.786841	-2.28195	0.000111637	0.0132488	0.0125246	139	tags=50%, list=5%, signal=48%	ATR/RPL23/RPS7/RPL11/RPL26/RPL37/RPS20	Down-regulated	NK.Cells
BP	GO:0006364	rRNA processing	68	-0.533941	-2.23831	7.54935e-07	0.0001543	0.000145866	205	tags=32%, list=7%, signal=31%	LYAR/DIS3/NOL8/RPL27/RPS8/RPL10A/RPL35/RPS7/RPL14/RPS24/RPS16/RPL7A/RPL11/RPL35A/RPL26/RPS27/RPS17/RPS14/RPS6/RPS19/RPS21/RPS25	Down-regulated	NK.Cells
CC	GO:0005791	rough endoplasmic reticulum	24	-0.653621	-2.12049	0.000151592	0.0159345	0.0150634	180	tags=33%, list=6%, signal=32%	HM13/RPL27/RPL4/RPS26/RPL6/RPS21/RPS23/RPS29	Down-regulated	NK.Cells
BP	GO:0033077	T cell differentiation in thymus	33	-0.558624	-1.98391	0.000349646	0.0331167	0.0313064	62	tags=18%, list=2%, signal=18%	JMJD6/CD3E/RPS6/CD3G/CD3D/B2M	Down-regulated	NK.Cells
CC	GO:0005925	focal adhesion	169	-0.31297	-1.44128	0.000248826	0.0247414	0.0233889	170	tags=18%, list=6%, signal=18%	RPL12/RPL27/CPNE3/RPLP1/RPS11/RPL4/RPS3A/RPS8/RPL10A/RPL23/RPS7/RPS16/RPS3/RPL7A/RPL31/RPS13/RPL6/RPL3/RPL38/RPS17/RPS14/RPL19/RPLP2/RPS19/RPL37A/RPS4X/RPL30/RPL9/RPL13A/B2M/RPS29	Down-regulated	NK.Cells
BP	GO:0007010	cytoskeleton organization	287	0.435162	1.38298	0.000508321	0.0406546	0.0384323	886	tags=38%, list=29%, signal=30%	MYOM2/PLEK/SETD3/MACF1/S100A9/S100A8/PRKAR1A/ADD1/GPR65/MARK2/CUL3/ARPC4/TLN1/ACTR3/PDCD6IP/SIPA1/GOLGA8A/EVL/TWF2/CYLD/TACC1/PSTPIP1/SLK/ARF6/ABI3/PPP2R1A/ARPC5/JAK2/VPS4B/ACTG1/SPTBN1/NUDC/TPM3/PPP1R12A/MSN/CCDC69/TUBB/CORO1B/WDR1/UTRN/HTT/CORO1A/ABLIM1/CLTC/ACTN4/TYROBP/CSNK1A1/DBNL/VASP/GAS7/TSPAN32/NEDD9/CCDC88B/TPM4/PFN1/IQGAP1/KPNB1/KLHL24/KRAS/RALA/ARHGAP4/CD47/CFLAR/RAC2/DIAPH1/USP33/CDC…	Up-regulated	NK.Cells
MF	GO:0036094	small molecule binding	487	0.439345	1.41396	2.25284e-06	0.000414409	0.000391757	941	tags=39%, list=31%, signal=32%	GIMAP4/CXXC5/GBP4/GIMAP6/TXK/JAK1/S100A9/S100A8/PRKAR1A/PIM2/CTBP2/SEPTIN6/MARK2/HIPK2/PIM1/GBP5/GBP1/GIMAP7/STARD3NL/ACTR3/GIMAP1/SLFN13/GIMAP5/GAK/STK17A/FGR/TWF2/DDX55/RAB8B/LYN/HSPA8/ANXA6/CCT8/SLK/RALB/GBP2/ARF6/SLFN5/NARS1/NLRC3/SARS1/JAK2/LBR/VPS4B/ACTG1/G3BP1/TXNRD1/MAPK14/STK39/OSBPL5/HELZ/ATP2B4/ME2/CLK2/SMG1/CSNK1G3/THRAP3/ACBD5/DNAJA1/RAB10/PIP4K2A/TUBB/ATP11B/PRKX/GFOD1/DYRK2/CEP104/…	Up-regulated	NK.Cells
MF	GO:0043168	anion binding	480	0.456597	1.46912	4.61758e-08	1.13254e-05	1.07063e-05	929	tags=40%, list=31%, signal=33%	GIMAP4/PLEK/GBP4/GIMAP6/TXK/JAK1/AKR1C3/S100A9/S100A8/PRKAR1A/PIM2/SEPTIN6/MARK2/SYTL2/HIPK2/PIM1/GBP5/GBP1/ARHGAP9/GIMAP7/SNX18/ACTR3/GIMAP1/SLFN13/GIMAP5/GAK/STK17A/FGR/TWF2/DDX55/RAB8B/LYN/PLEKHA2/HSPA8/ANXA6/CCT8/SLK/RALB/GBP2/ARF6/SLFN5/NARS1/NLRC3/CERT1/SARS1/JAK2/LBR/VPS4B/ACTG1/G3BP1/KRIT1/TXNRD1/MAPK14/STK39/HELZ/ATP2B4/CLK2/SMG1/CSNK1G3/THRAP3/DNAJA1/RAB10/PIP4K2A/TUBB/ATP11B/PRKX/DYRK2…	Up-regulated	NK.Cells
CC	GO:0005887	integral component of plasma membrane	164	0.488784	1.52738	0.000149854	0.0159345	0.0150634	640	tags=34%, list=21%, signal=28%	FCER1G/IL18RAP/CX3CR1/IL2RB/KLRD1/IFNAR2/PILRB/FCRL3/KLRF1/SLC38A2/GPR65/TNFSF10/KLRC1/M6PR/FCGR3A/SLC38A1/SELPLG/IL18R1/LYN/HLA-H/STOM/KLRC4-KLRK1/JAK2/SELL/ATP2B4/NCR1/IL27RA/PLXNC1/TRAF5/TYROBP/CALM3/SLC12A6/PTPRC/CD63/TSPAN32/KCNAB2/ITGA6/LNPEP/SPN/LMAN2/NCF4/CD53/IRAG2/SLCO4C1/S1PR4/CD47/BIRC2/PTGER2/RAC2/TMBIM6/NPC1/IL17RA/TMC6/SLC20A1/ESYT2	Up-regulated	NK.Cells
BP	GO:0002443	leukocyte mediated immunity	121	0.518394	1.58957	9.96684e-05	0.0122227	0.0115545	444	tags=30%, list=15%, signal=26%	FCER1G/PRF1/CX3CR1/SH2D1B/PTGDR/KLRD1/CD300A/TRDC/KMT5B/KLRC1/FCGR3A/CD160/IL18R1/FGR/BTN3A2/LYN/HLA-H/KLRC4-KLRK1/NCR1/IL27RA/NBN/INPP5D/TUBB/PLCG2/WDR1/SYK/CORO1A/CTSC/SH2D1A/TYROBP/PTPRC/SLAMF7/GZMB/VAMP8/LAT2/DDX1	Up-regulated	NK.Cells
BP	GO:0050878	regulation of body fluid levels	66	0.568988	1.6455	0.000407448	0.0374689	0.0354208	430	tags=27%, list=14%, signal=24%	FCER1G/PLEK/TXK/ENPP4/FLI1/XBP1/TLN1/LYN/VAV3/JAK2/ACTG1/MAPK14/STK39/PLCG2/SYK/TSPAN32/VAMP8/CLIC1	Up-regulated	NK.Cells
BP	GO:0007599	hemostasis	47	0.607844	1.69457	0.000417566	0.0374689	0.0354208	430	tags=32%, list=14%, signal=28%	FCER1G/PLEK/TXK/ENPP4/FLI1/TLN1/LYN/VAV3/JAK2/ACTG1/MAPK14/PLCG2/SYK/TSPAN32/CLIC1	Up-regulated	NK.Cells
BP	GO:0050764	regulation of phagocytosis	29	0.666551	1.7155	0.000571718	0.0441936	0.0417778	524	tags=41%, list=17%, signal=35%	FCER1G/IL2RB/CD300A/FGR/PLCG2/ABCA7/SYK/PTPRC/ATG3/LMAN2/CAMK1D/CD47	Up-regulated	NK.Cells
MF	GO:0051015	actin filament binding	58	0.615477	1.74679	4.79236e-05	0.0067812	0.00641051	449	tags=41%, list=15%, signal=36%	MYOM2/MACF1/ADD1/ARPC4/TLN1/ACTR3/TWF2/ANXA6/PSTPIP1/ABI3/ARPC5/SPTBN1/TPM3/LASP1/CORO1B/WDR1/UTRN/CORO1A/ABLIM1/ACTN4/DBNL/GAS7/TPM4/IQGAP1	Up-regulated	NK.Cells
BP	GO:0002347	response to tumor cell	12	0.863979	1.88057	1.8377e-05	0.00278208	0.00263001	161	tags=33%, list=5%, signal=32%	PRF1/TXNIP/CD160/ABI3	Up-regulated	NK.Cells
MF	GO:0140375	immune receptor activity	31	0.74484	1.93671	1.24945e-06	0.000241933	0.000228708	230	tags=42%, list=8%, signal=39%	FCER1G/IL18RAP/CX3CR1/IL2RB/KLRD1/IFNAR2/KLRF1/KLRC1/FCGR3A/CD160/IL18R1/KLRC4-KLRK1/IL27RA	Up-regulated	NK.Cells

## Sheet: Basophils
ONTOLOGY	ID	Description	setSize	enrichmentScore	NES	pvalue	p.adjust	qvalue	rank	leading_edge	core_enrichment	Expression	CellType
CC	GO:0044391	ribosomal subunit	88	-0.763901	-2.80758	3.86411e-20	4.49911e-17	4.32916e-17	440	tags=69%, list=17%, signal=59%	MRPS21/RPL35A/RPL37/RPLP0/RPL36AL/MRPL41/RPL3/RPS11/RPL15/RPLP2/RACK1/RPS6/RPS24/RPL29/RPS19/RPS26/RPL26/RPS13/RPS28/RPL18A/RPS25/RPS17/RPL11/DAP3/RPL35/RPL24/RPS4X/RPL22/RPL10/RPS27/RPL4/RPL37A/RPS7/RPL27/RPS16/RPL13/RPS23/RPL12/RPL21/RPS29/FAU/RPL19/RPL23/RPS2/RPL38/RPL18/RPS10/RPL13A/RPS9/MRPL20/RPS27A/RPL17/RPL7/RPS20/RPS14/RPL10A/RPL28/RPS21/RPL8/RPS12/RPS8	Down-regulated	Basophils
MF	GO:0003735	structural constituent of ribosome	86	-0.763059	-2.79424	3.60945e-20	4.49911e-17	4.32916e-17	440	tags=70%, list=17%, signal=60%	MRPS21/RPL35A/RPL37/RPLP0/RPL36AL/MRPL41/RPL3/RPS11/RPL15/RPLP2/RPS6/RPS24/RPL29/RPS19/RPS26/RPL26/RPS13/RPS28/RPL18A/RPS25/RPS17/RPL11/DAP3/RPL35/RPL24/RPS4X/RPL22/RPL10/RPS27/RPL4/RPL37A/RPS7/RPL27/RPS16/RPL13/RPS23/RPL12/RPL21/RPS29/FAU/RPL19/RPL23/RPS2/RPL38/RPL18/RPS10/RPL13A/RPS9/MRPL20/RPS27A/RPL17/RPL7/RPS20/RPS14/RPL10A/RPL28/RPS21/RPL8/RPS12/RPS8	Down-regulated	Basophils
CC	GO:0005840	ribosome	100	-0.736751	-2.76211	3.5919e-20	4.49911e-17	4.32916e-17	440	tags=64%, list=17%, signal=55%	MRPS21/RPL35A/RPL37/RPLP0/RPL36AL/MRPL41/RPL3/RPS11/RPL15/RPLP2/RACK1/RPS6/RPS24/RPL29/RPS19/RPS26/RPL26/RPS13/RPS28/RPL18A/RPS25/RPS17/RPL11/DAP3/RPL35/RPL24/RPS4X/RPL22/RPL10/RPS27/RPL4/EIF3H/RPL37A/RPS7/RPL27/RPS16/SF1/RPL13/RPS23/RPL12/RPL21/RPS29/RRBP1/FAU/RPL19/RPL23/RPS2/RPL38/RPL18/RPS10/RPL13A/RPS9/MRPL20/RPS27A/RPL17/RPL7/RPS20/RPS14/RPL10A/RPL28/RPS21/RPL8/RPS12/RPS8	Down-regulated	Basophils
BP	GO:0002181	cytoplasmic translation	114	-0.683333	-2.60555	4.02733e-17	2.81349e-14	2.70722e-14	443	tags=61%, list=17%, signal=52%	EIF5/RPL35A/RPL37/RPLP0/RPL3/RPS11/RPL15/RPLP2/EIF3D/RACK1/RWDD1/RPS6/ZC3H15/RPS24/RPL29/RPS19/RPS26/RPL26/YBX1/RBM4/RPS13/RPS28/RPL18A/RPS25/RPS17/RPL11/RPL35/RPL24/EIF4A2/RPS4X/RPL22/RPL10/RPS27/RPL4/EIF3H/RPL37A/PABPC1/RPS7/RPL27/CNBP/RPS16/EIF3E/RPL13/RPS23/ETF1/RPL12/RPL21/RPS29/FAU/HNRNPU/RPL19/RPL23/RPS2/RPL38/RPL18/RPS10/RPL13A/RPS9/RPS27A/RPL17/RPL7/RPS20/RPS14/RPL10A/RPL28/RPS21/RPL8/RP…	Down-regulated	Basophils
BP	GO:0006364	rRNA processing	46	-0.734451	-2.39137	6.32093e-10	1.16205e-07	1.11816e-07	452	tags=61%, list=18%, signal=51%	TRMT112/RPF1/RPL35A/NOP53/RPS6/RPS24/RPS19/PA2G4/RPL26/RPS28/RPS25/RPS17/RPL11/RPL35/TENT4B/RPS27/RPS7/RPL27/RPS16/FBL/FCF1/DDX27/RPL7/RPS14/RPL10A/RSL1D1/RPS21/RPS8	Down-regulated	Basophils
BP	GO:0022613	ribonucleoprotein complex biogenesis	129	-0.590994	-2.28769	9.06568e-11	2.26189e-08	2.17645e-08	491	tags=47%, list=19%, signal=40%	RPL5/RPSA/EIF3K/NOP10/RPL23A/DICER1/NSA2/SNRPB2/PRPF6/RPL6/TRMT112/RPF1/LUC7L2/EIF5/RPL35A/RPLP0/NOP53/SRSF9/EIF3D/SNRPD2/SRSF5/RPS6/RPS24/RPS19/PA2G4/RPL26/SF3B2/RPS28/RPS25/RPS17/USP4/SFSWAP/STRAP/RPL11/RPL35/RPL24/TENT4B/RPL10/RPS27/HSP90AA1/EIF3H/RPS7/RPL27/RPS16/EIF3E/SF1/LUC7L/FBL/FCF1/RAN/RPL38/SNRNP200/RPL13A/MRPL20/DDX27/RPL7/RPS14/RPL10A/RSL1D1/RPS21/RPS8	Down-regulated	Basophils
MF	GO:0019843	rRNA binding	28	-0.719781	-2.11867	2.43999e-05	0.00315663	0.00303739	642	tags=75%, list=25%, signal=57%	CIRBP/RPS4Y1/RPS3/RPL5/RPL23A/RPL9/RPF1/RPL37/RPLP0/NOP53/RPL3/RPS11/RPS13/RPL11/RPS4X/RPL12/RPL23/RPS9/MRPL20/RPS14/RPL8	Down-regulated	Basophils
BP	GO:0071347	cellular response to interleukin-1	21	-0.704964	-1.95213	0.000208672	0.0196998	0.0189556	295	tags=38%, list=12%, signal=34%	IRAK1/IRAK3/HIF1A/RELA/MAPK13/CXCL8/CCL5/EGR1	Down-regulated	Basophils
BP	GO:0051130	positive regulation of cellular component organization	222	0.358409	1.62394	7.22436e-05	0.00742196	0.0071416	578	tags=31%, list=23%, signal=26%	RGS2/ROCK1/RAB31/TAL1/RESF1/GATA2/CDC16/BRAF/ARF6/CNOT6L/NCK1/CUL3/RUNX1/VPS4B/ANXA1/WASF2/PIK3CA/G3BP1/NIN/RALB/CCT5/TNFSF10/TPR/PIP4K2A/ARRB2/TERF2IP/DNMT1/DHX36/ACTR2/HIP1/AHNAK/ATMIN/IGF1R/SMC5/AKIRIN1/DGKD/FLNA/TGFB1/FMR1/KATNBL1/RALA/VPS28/MACF1/CLSTN1/MARK2/TCP1/LIMS1/SNX3/CRBN/PLXNC1/PPHLN1/VASP/MSN/SIN3A/RAB3GAP2/CDKN1B/SH3GLB1/YY1/HGF/ATF7IP/DNM2/ROCK2/PHIP/CD63/GOLGA4/CDK5RAP2/DDX3X/PA…	Up-regulated	Basophils
BP	GO:0022603	regulation of anatomical structure morphogenesis	165	0.390696	1.71362	4.86334e-05	0.00530864	0.00510811	872	tags=48%, list=34%, signal=34%	ROCK1/HHEX/GATA2/SPART/BRAF/AGGF1/RHOB/TNIK/SH3KBP1/RUNX1/ANXA1/MYH9/XBP1/NIN/CSF1/CCR3/ST6GAL1/CORO1A/LFNG/CD44/DHX36/ACTR2/CRK/C3AR1/FGD3/JAK1/MTDH/FLNA/TGFB1/DIP2B/RALA/CXCR2/MACF1/MARK2/PIK3CD/LIMS1/PLXNC1/PREX1/STAT2/GNA13/MSN/DIAPH1/SLC9A3R1/BTBD7/HGF/DNM2/ROCK2/PHIP/GOLGA4/FOXP1/SP1/CDC42EP3/TGFBR2/MAP2K2/STAT1/CAPZB/PSEN1/RNF6/GLUL/RAC2/VPS35/PTEN/CALR/FMNL1/EMILIN2/EEF2K/HIPK1/NEDD9/MECP…	Up-regulated	Basophils
BP	GO:0042060	wound healing	84	0.458948	1.8123	0.000392927	0.0343123	0.0330162	493	tags=35%, list=19%, signal=29%	TLN1/GATA2/RAF1/ADIPOR2/JAK2/STXBP3/FCER1G/VPS4B/ANXA1/MYH9/XBP1/PIK3CA/SH2B3/CD44/ARFGEF1/RAB27A/CRK/AHNAK/AP3B1/DGKD/FLNA/TGFB1/PPIA/MACF1/CASP3/MIA3/BLOC1S6/CLIC1/GNA13	Up-regulated	Basophils
BP	GO:0031279	regulation of cyclase activity	13	0.773766	1.97313	0.000315917	0.0282948	0.027226	203	tags=38%, list=8%, signal=36%	RGS2/RAF1/CAP1/P2RY13/CALM2	Up-regulated	Basophils
BP	GO:1904063	negative regulation of cation transmembrane transport	20	0.70615	2.00421	0.000204243	0.0196998	0.0189556	688	tags=65%, list=27%, signal=48%	RGS2/FBXO11/SLC43A2/CALM2/ISCU/KCNE3/TMBIM6/FMR1/CRBN/SLC9A3R1/SRI/CALM1/PPP3R1	Up-regulated	Basophils
BP	GO:0034766	negative regulation of ion transmembrane transport	21	0.696691	2.01029	0.000197805	0.0196998	0.0189556	688	tags=62%, list=27%, signal=46%	RGS2/FBXO11/SLC43A2/CALM2/ISCU/KCNE3/TMBIM6/FMR1/CRBN/SLC9A3R1/SRI/CALM1/PPP3R1	Up-regulated	Basophils

## Sheet: Dendritic.cells
ONTOLOGY	ID	Description	setSize	enrichmentScore	NES	pvalue	p.adjust	qvalue	rank	leading_edge	core_enrichment	Expression	CellType
CC	GO:0022626	cytosolic ribosome	85	-0.886465	-3.21247	2.68293e-34	4.03648e-31	3.90014e-31	193	tags=75%, list=10%, signal=71%	RPL35/RACK1/RPL10A/RPLP1/RPL7A/RPS26/RPL8/UBA52/RPS14/RPL38/RPL27/RPL24/RPL36AL/RPS15/RPL18/RPL3/RPL14/RPS11/RPL6/RPS4X/RPS3A/RPS7/RPL13/RPS16/RPL17/RPS25/RPL27A/RPL5/RPLP2/RPL36A/RPS21/RPL35A/RPL9/RPS8/RPS18/RPS2/RPS19/RPL23A/RPL21/RPS20/RPL12/RPL34/RPL31/RPL32/RPL10/RPS27A/FAU/RPL36/RPS24/RPL19/RPL13A/RPL23/RPS13/RPL11/RPS12/RPS23/RPS17/RPS6/RPL26/RPL37A/RPL37/RPS15A/RPL30/RPS29	Down-regulated	Dendritic.cells
BP	GO:0002181	cytoplasmic translation	112	-0.842956	-3.19984	1.47076e-34	4.03648e-31	3.90014e-31	193	tags=57%, list=10%, signal=55%	RPL35/RACK1/RPL10A/RPLP1/RPL7A/RPS26/RPL8/UBA52/RPS14/RPL38/RPL27/RPL24/RPS15/RPL18/RPL3/RPL14/RPS11/RPL6/RPS4X/RPS3A/RPS7/PABPC1/RPL13/RPS16/RPL17/RPS25/RPL27A/RPL5/RPLP2/RPL36A/RPS21/RPL35A/RPL9/RPS8/RPS18/RPS2/RPS19/RPL23A/RPL21/RPS20/RPL12/RPL34/RPL31/RPL32/RPL10/RPS27A/FAU/RPL36/RPS24/RPL19/RPL13A/RPL23/RPS13/RPL11/RPS12/RPS23/RPS17/RPS6/RPL26/RPL37A/RPL37/RPS15A/RPL30/RPS29	Down-regulated	Dendritic.cells
MF	GO:0003735	structural constituent of ribosome	85	-0.881051	-3.19285	4.10661e-33	3.0892e-30	2.98486e-30	162	tags=71%, list=8%, signal=68%	RPL7A/RPS26/RPL8/UBA52/RPS14/RPL38/RPL27/RPL24/RPL36AL/RPS15/RPL18/RPL3/RPL14/RPS11/RPL6/RPS4X/RPS3A/RPS7/RPL13/RPS16/RPL17/RPS25/RPL27A/RPL5/RPLP2/RPL36A/RPS21/RPL35A/RPL9/RPS8/RPS18/RPS2/RPS19/RPL23A/RPL21/RPS20/RPL12/RPL34/RPL31/RPL32/RPL10/RPS27A/FAU/RPL36/RPS24/RPL19/RPL13A/RPL23/RPS13/RPL11/RPS12/RPS23/RPS17/RPS6/RPL26/RPL37A/RPL37/RPS15A/RPL30/RPS29	Down-regulated	Dendritic.cells
BP	GO:0042254	ribosome biogenesis	59	-0.666481	-2.26403	2.35469e-07	3.08055e-05	2.97651e-05	234	tags=51%, list=12%, signal=46%	RPS27/FBL/XRCC5/RPL35/RPL10A/RPL7A/RPS14/RPL38/RPL27/GLUL/RPL24/RPS15/RPL14/RPL6/RPS7/DDX21/RPS16/RPS25/RPL5/RPS21/RPL35A/RPS8/RPS19/RPL23A/RPL10/RPS24/RPL11/RPS17/RPS6/RPL26	Down-regulated	Dendritic.cells
BP	GO:0006364	rRNA processing	37	-0.733857	-2.22324	1.21255e-06	0.000130306	0.000125905	234	tags=65%, list=12%, signal=58%	RPL7/RPS27/FBL/RPL35/RPL10A/RPL7A/RPS14/RPL27/RPS15/RPL14/RPS7/DDX21/RPS16/RPS25/RPL5/RPS21/RPL35A/RPS8/RPS19/RPS24/RPL11/RPS17/RPS6/RPL26	Down-regulated	Dendritic.cells
BP	GO:0016072	rRNA metabolic process	44	-0.701193	-2.19963	1.17054e-06	0.000130306	0.000125905	193	tags=55%, list=10%, signal=50%	RPL7/RPS27/FBL/RPL35/RPL10A/RPL7A/RPS14/RPL27/RPS15/RPL14/RPS7/DDX21/RPS16/RPS25/RPL5/RPS21/RPL35A/RPS8/RPS19/RPS24/RPL11/RPS17/RPS6/RPL26	Down-regulated	Dendritic.cells
BP	GO:0001906	cell killing	43	-0.663675	-2.07237	1.43372e-05	0.00126884	0.00122599	155	tags=28%, list=8%, signal=26%	RAB27A/HLA-A/CLEC7A/HLA-E/NKG7/FCGR3A/KLRB1/RPS19/B2M/GNLY/LYZ/RPL30	Down-regulated	Dendritic.cells
BP	GO:0019730	antimicrobial humoral response	16	-0.84447	-2.07236	2.07612e-05	0.0016018	0.0015477	133	tags=56%, list=7%, signal=53%	HLA-A/HLA-E/RPS19/S100A9/CXCL8/GNLY/FAU/LYZ/RPL30	Down-regulated	Dendritic.cells
BP	GO:1901798	positive regulation of signal transduction by p53 class mediator	11	-0.920481	-2.05088	4.70084e-06	0.000487752	0.000471278	107	tags=64%, list=6%, signal=60%	RPS15/RPS7/RPS20/RPL23/RPL11/RPL26/RPL37	Down-regulated	Dendritic.cells
BP	GO:0051438	regulation of ubiquitin-protein transferase activity	15	-0.837876	-1.99964	6.17866e-05	0.00432362	0.00417759	107	tags=53%, list=6%, signal=51%	RPS15/RPS7/RPL5/RPS2/RPS20/RPL23/RPL11/RPL37	Down-regulated	Dendritic.cells
CC	GO:0005925	focal adhesion	154	-0.493144	-1.94587	6.30715e-07	7.59129e-05	7.33489e-05	184	tags=26%, list=9%, signal=26%	RPL10A/RPLP1/EVL/RPL7A/RPL8/RPS14/ARPC3/RPL38/ITGB2/RPL27/CD46/HCK/RPS15/RPL18/RPL3/RPS11/RPL6/RPS4X/RPS3A/RPS7/PABPC1/RPS16/RPL5/RPLP2/RPL9/RPS8/RPS18/RPS2/RPS19/RPL12/RPL31/B2M/RPL19/RPL13A/RPL23/RPS13/RPS17/RPL37A/RPL30/RPS29	Down-regulated	Dendritic.cells
MF	GO:0003723	RNA binding	467	-0.375354	-1.64837	7.02846e-09	1.00708e-06	9.73063e-07	162	tags=20%, list=8%, signal=24%	CAPRIN1/PSMA1/DENR/SF3B2/RPS27/NABP1/RBM34/MBNL1/FBL/ACTN1/XRCC5/SCAF11/CAST/TMSB4X/VIM/CNOT7/TIAL1/S100A4/THUMPD1/RPL35/RACK1/RPL10A/IFIT2/TARDBP/RPL7A/NAP1L1/RPS26/SUMO1/RPL8/RPS14/BTF3/EIF1/RPL38/RPL27/HNRNPF/HLA-A/RPL24/IFIT3/RPS15/RPL18/RPL3/RPL14/RPS11/RPL6/RPS4X/HSP90AA1/RPS3A/RPS7/DDX21/PABPC1/RPL13/RPS16/RPL17/RPS25/RPL27A/RPL5/RPL36A/RPS21/ZFP36L1/RPL35A/RPL9/RPS8/RPS18/RPS2/RPS19/RPL23…	Down-regulated	Dendritic.cells
CC	GO:0005615	extracellular space	486	-0.344267	-1.50745	3.57749e-07	4.48528e-05	4.33378e-05	159	tags=14%, list=8%, signal=17%	RPS26/RAB27A/UBA52/RPS14/ARPC3/ITGB2/RPL27/GLUL/HLA-A/IGLC2/RPL24/CD46/RFC1/TAX1BP1/HLA-E/RPL3/RPL14/BTG2/RPS11/HLA-C/RPS4X/HSP90AA1/RPS3A/FCGR3A/PABPC1/FGFBP2/RPS16/MYL12A/RPS25/CTSS/RPL5/RPLP2/RPL35A/NAMPT/TUBA1A/RPS8/H3-3B/RPS18/RPS2/RPS19/RPL23A/S100A9/RPS20/RPL12/CXCR4/RPL34/CXCL8/RPL31/CCL5/S100A8/B2M/GNLY/RPS27A/FAU/RPL23/RPS13/RPL11/FTH1/SRGN/LYZ/RPL26/RPL37A/TPT1/RPS15A/RPL30/RPS29	Down-regulated	Dendritic.cells
CC	GO:0016021	integral component of membrane	379	0.380835	1.4271	0.000799187	0.0437228	0.042246	398	tags=24%, list=21%, signal=24%	IL18R1/OSTC/SCN9A/EPHB1/MLEC/PLD4/PTPRA/CD68/FLNB/CMKLR1/SACM1L/ODR4/TMEM63A/NFE2L1/SCARB2/LILRA4/COA1/TMEM33/RPN1/TMX1/CD4/MAN1A1/SSR3/SEL1L3/VAMP8/SFT2D2/TNFRSF1A/LAIR1/TMEM43/LEMD3/CD99/NPC1/CERS2/SCO1/TPST2/STEAP4/TMED4/CDS2/ITPR2/RRBP1/IL6ST/FAM118A/GPR183/CYB561A3/SEC61B/CSGALNACT2/GOSR1/TMEM71/UGCG/STT3B/ITM2C/SLC12A9/ARL6IP5/UBE2J1/MYO9A/TMEM19/TMEM30A/MS4A6A/ENTPD4/ATP11A/TMEM248/TMEM50A…	Up-regulated	Dendritic.cells
MF	GO:0043168	anion binding	309	0.400687	1.46978	0.00034947	0.0223735	0.0216178	460	tags=30%, list=24%, signal=27%	EPHB1/PFKFB2/DCK/LRRK1/DHX15/ARL11/NADK/GSN/CLPX/DDX1/MAP2K6/FCHSD2/ARHGAP5/HSPA1A/MAPKAPK3/CCT3/RUNX2/STEAP4/PDXDC1/ACTR3/ITPR2/PAPOLG/HIPK2/SMC6/SVIL/BAZ1B/CHD3/PSMC5/ITM2C/THRAP3/EGLN1/HSP90B1/PIK3CG/PITPNA/UBE2J1/MYO9A/MAPK14/NARS1/SMC1A/RPS6KA1/ATP11A/GNL2/N4BP2/OXSR1/CCT8/SLK/CCT5/MAT2A/GLUD1/PPIP5K2/ACOX1/DDX17/MAPKAPK2/G3BP1/DGKD/SMARCA5/SMG1/RAN/DNM2/HIP1/PIKFYVE/ITPR1/RAB10/PAK1/ARAP2/E…	Up-regulated	Dendritic.cells
BP	GO:0045184	establishment of protein localization	258	0.421493	1.5286	0.000357609	0.0224176	0.0216604	416	tags=31%, list=21%, signal=28%	PFKFB2/AP3D1/CD68/ARL11/CLTC/APPL1/SCARB2/GGA2/IPO5/MAN1A1/CEP290/SSR3/VAMP8/YWHAE/FCHSD2/IPO7/SFT2D2/CCT3/SNX9/NPC1/TMED4/RRBP1/RUFY3/SEC61B/PCNT/GOSR1/TXNIP/HUWE1/SNF8/CD2AP/HSP90B1/AKAP8/ARL6IP5/UBE2J1/USO1/MAPK14/TMEM30A/NPEPPS/NMT1/CCT8/CCT5/GLUD1/SPCS3/OS9/PDCD10/TXN/KLF7/VPS35/DGKD/ZDHHC17/TMEM167A/NF1/NASP/CANX/STX16/MDFIC/RAN/DNM2/HIP1/ACTN4/PIKFYVE/MDM2/GOLGA2/RAB10/ARFGEF1/SNAP29/PTPN1…	Up-regulated	Dendritic.cells
MF	GO:0016740	transferase activity	240	0.426641	1.53936	0.00039167	0.0231085	0.022328	464	tags=31%, list=24%, signal=27%	OSTC/EPHB1/PFKFB2/DCK/SETBP1/LRRK1/NADK/RPN1/MAP2K6/IRF2BPL/PCMTD1/MAPKAPK3/UBE4A/CERS2/TPST2/CDS2/TRIM52/PAPOLG/TRAF4/HIPK2/CSGALNACT2/BAZ1B/UGCG/HUWE1/CHFR/STT3B/BIRC6/PIK3CG/UBE2J1/MAPK14/CUL5/RPS6KA1/N4BP2/NMT1/OXSR1/KMT2D/SLK/ST3GAL2/MAT2A/KAT2B/PPIP5K2/TRIM44/CUL3/MAPKAPK2/NSD1/DGKD/ZDHHC17/SMG1/PRMT2/PIKFYVE/LPGAT1/MDM2/CREBBP/HEXB/ITCH/PAK1/KAT6B/IKBKB/CDK19/CAMK4/RPS6KA5/MSL2/IGF2R/TBK1/…	Up-regulated	Dendritic.cells
MF	GO:0032559	adenyl ribonucleotide binding	212	0.43939	1.56045	0.000280668	0.0183593	0.0177392	460	tags=30%, list=24%, signal=26%	EPHB1/PFKFB2/DCK/LRRK1/DHX15/NADK/CLPX/DDX1/MAP2K6/HSPA1A/MAPKAPK3/CCT3/RUNX2/ACTR3/PAPOLG/HIPK2/SMC6/BAZ1B/CHD3/PSMC5/ITM2C/THRAP3/HSP90B1/PIK3CG/PITPNA/UBE2J1/MYO9A/MAPK14/NARS1/SMC1A/RPS6KA1/ATP11A/N4BP2/OXSR1/CCT8/SLK/CCT5/MAT2A/GLUD1/PPIP5K2/DDX17/MAPKAPK2/G3BP1/DGKD/SMARCA5/SMG1/PIKFYVE/PAK1/ENTPD1/IKBKB/CDK19/CAMK4/RPS6KA5/TBK1/DICER1/NADSYN1/EIF4G1/CHD9/NT5C2/DDX42/CSNK1A1/DDX18/PAK2/TOP2B	Up-regulated	Dendritic.cells
CC	GO:0016604	nuclear body	192	0.464966	1.63464	0.000107314	0.00733883	0.00709096	480	tags=31%, list=25%, signal=26%	AFF3/SETBP1/PQBP1/S100PBP/DHX15/CBX5/SFMBT2/DDX1/YLPM1/SUGP2/BANP/NONO/RANBP9/RSRC1/HSPA1A/AKAP8L/ZNF217/SMU1/MSL1/TRIM52/PAPOLG/HIPK2/PCBP1/SMC6/CHD3/PSPC1/CHFR/THRAP3/ZBTB18/SUMO2/MAPK14/MEF2C/PRPF8/ELF2/SRSF6/SP3/SRSF9/SUDS3/DDX17/SPN/NPAT/NFE2/ZNF638/SREK1/ACTN4/PCNP/MDM2/CREBBP/PACSIN2/SRSF1/SRRM1/ATMIN/SRP19/DDX42/CSNK1A1/RB1/ZBTB20/DCAF7/PPP4R3B/PARK7	Up-regulated	Dendritic.cells
