# Supplementary material for: Chromatin, transcriptional and immune dysregulation in children with neurodevelopmental regression
Source: medRxiv preprint, doi:10.1101/2025.03.05.25322433, version 1 (2025-03-06)
Supplement: Supplemental Table 7 [file 322433_file13.xlsx]

## Sheet: Sheet 1
annotation_id
